# Murine *Staphylococcus aureus* chronic infection is cured by theory-driven therapy

Lito A. Papaxenopoulou<sup>1</sup>, Gang Zhao<sup>1</sup>, Sahamoddin Khailaie<sup>1</sup>, Konstantinos Katsoulis-Dimitriou<sup>2</sup>, Ingo Schmitz<sup>2, 3</sup>, Eva Medina<sup>4</sup>, Haralampos Hatzikirou<sup>1, \*</sup> and Michael Meyer-Hermann<sup>1, 5, 6, \*</sup>

<sup>1</sup>Department of Systems Immunology and Braunschweig Integrated Centre of Systems Biology, Helmholtz Centre for Infection Research, Rebenring 56, 38106 Braunschweig, Germany

<sup>2</sup>Institute for Molecular and Clinical Immunology, Medical Faculty, Otto-von-Guericke-Universität, Leipziger Straße 44, 39120, Magdeburg, Germany

<sup>3</sup>Systems-oriented Immunology and Inflammation Research Group, Department of Experimental Immunology, Helmholtz Centre for Infection Research, Inhoffenstraße 7, 38124 Braunschweig, Germany

<sup>4</sup>Department of Infection Immunology, Helmholtz Centre for Infection Research, Inhoffenstraße 7, 38124, Braunschweig, Germany

<sup>5</sup>Institute for Biochemistry, Biotechnology and Bioinformatics, Technische Universität Braunschweig, Spielmannstraße 7, 38106 Braunschweig, Germany

<sup>6</sup>Centre for Individualised Infection Medicine (CiiM), Feodor-Lynen-Straße 15, 30625, Hannover, Germany.

\* Corresponding authors: Haralampos Hatzikirou: [haralampos.hatzikirou@theoretical-biology.de](mailto:haralampos.hatzikirou@theoretical-biology.de); Michael Meyer-Hermann: [mmh@theoretical-biology.de](mailto:mmh@theoretical-biology.de).

*The authors declare that there is no conflict of interests.*

## Abstract

*Staphylococcus aureus* (*S. aureus*) is a challenging human pathogen due to its ability to evade the immune system and resist multidrug antibiotics. These evasive strategies lead to chronic and recurrent infections. Many studies have documented that during chronic infections Myeloid Derived Suppressor Cells (MDSCs) exert immunosuppressive mechanisms on T cells. A mathematical model explains how the steady state of chronic infection can be disturbed and suggests therapeutic strategies to clear the infection. Model-driven suggestions were tested experimentally and confirmed complete clearance of *S. aureus* chronic infection.

## Keywords

Myeloid Derived Suppressor Cells, MDSCs, *Staphylococcus aureus*, chronic infection, mathematical model, therapy, cure, heat-killed cells

*Staphylococcus aureus* (*S. aureus*) is a bacterial human pathogen colonizing 20%-30% of the world population and responsible for the genesis of nosocomial-acquired and community-acquired bacterial infections. Colonization by *S. aureus* is typically asymptomatic, implying an equilibrated state between host and bacterium. However, the bacterium can become opportunistic often post-surgery or after implantation of medical devices and can cause skin and soft tissue infections, such as dermatitis, impetigo, and cellulitis<sup>1</sup>, as well as life-threatening conditions like pneumonia and chronic osteomyelitis<sup>2</sup>. Additionally, individuals with immune deficiencies are more susceptible to *S. aureus* infections. The pathogen constitutes a serious problem in clinics worldwide because it uses multiple mechanisms to persist in the host. These include strategies of bacterial

38 evasion, multi-drug antibiotic resistance, immunosuppression<sup>3</sup> or manipulation of the host's immune regulatory  
39 mechanisms,<sup>4;5</sup> which lead to chronic and difficult-to-treat infections.

40 Typically, immunosuppression is achieved via regulatory T cells (Tregs), T cell lysis, regulatory B cells  
41 (Bregs)<sup>6</sup>, and Myeloid-Derived Suppressor Cells (MDSCs). In the case of *S. aureus* chronic infections, immuno-  
42 suppression is not attributed to Bregs, tolerogenic dendritic cells, nor Tregs<sup>7</sup>. Treg-depletion has only a minor  
43 effect, whereas T-cell proliferation remains inhibited despite the absence of B220<sup>+</sup> and CD11c<sup>+</sup> cells<sup>7</sup>. Never-  
44 theless, T-cell suppression in chronically infected mice has been associated with the expansion of monocytic-like  
45 (CD11b<sup>+</sup>Ly6C<sup>+</sup>Ly6G<sup>low</sup> phenotype), neutrophilic-like (CD11b<sup>+</sup>Ly6C<sup>low</sup>Ly6G<sup>+</sup> phenotype) and eosinophilic-  
46 like (CD11b<sup>+</sup>Ly6C<sup>low</sup>Ly6G<sup>low</sup> phenotype) MDSCs<sup>7;8;9;10;11</sup>, affirming the dominant immunosuppressive role of  
47 MDSCs during chronic *S. aureus* infections.

48 MDSCs constitute a heterogeneous population of immature myeloid cells, which exert their suppressive  
49 effect on T cells by producing reactive oxygen species, nitric oxide, arginase, and inducible nitric oxide syn-  
50 thase. Significant MDSC expansion and the consequent immunosuppressive effect were reported in long-lasting  
51 pathological conditions, such as chronic bacterial and viral infections<sup>12;13;14</sup>, cancer<sup>15;16</sup>, and autoimmunity<sup>17</sup>.

52 In this study we focused on the impact of immunosuppression on the outcome of a *S. aureus* chronic infec-  
53 tion. Our aim was to investigate, how a *S. aureus* chronic infection can be fully resolved. Given the systemic  
54 MDSC-mediated suppression on T cells<sup>18</sup> and the fact that MDSC-depletion during a bacterial chronic infection  
55 is coupled with depletion of macrophages, and granulocytes, such as neutrophils<sup>18</sup>, it would be challenging to  
56 discover therapeutic treatments only by experimental means. However, modelling the chronic infection math-  
57 ematically could bestow a broader observation of possible treatments that *in silico* could be expeditiously and  
58 cost-effectively tested for rendering sterilizing immunity.

59 Mathematical models have been used to shed light on issues such as dynamics of *S. aureus* infection and the  
60 kinetics of bacterial growth<sup>19;20;21</sup>. Additionally, both deterministic and stochastic mathematical models have  
61 been established to illustrate *S. aureus* transmission and antibiotic resistance<sup>22;23;24;25;26;27</sup>. However, there is no  
62 mathematical model that illustrates, how a *S. aureus* chronic infection is established and resolved.

63 Herein, we developed a mathematical model that investigates the impact of MDSC suppressive effects during  
64 a *S. aureus* chronic infection aiming to clarify the mechanisms that favour chronicity. Our *in silico* analysis  
65 suggested that triggering an acute inflammation at the state of chronic *S. aureus* infection could perturb the  
66 chronic system and eradicate *S. aureus*. Our *in silico*-driven therapeutic strategy was validated in murine models  
67 *in vivo* by showing complete bacterial eradication.

## 68 Results

### 69 Mathematical model suggests therapeutic ideas

70 The mathematical model comprises of currently known interactions between bacteria B(t), T cells T(t) and  
71 immune regulation mediated by MDSCs. During onset of a chronic infection the existence of bacteria activates  
72 immune cells, which proliferate and hinder further growth of bacteria. At the same time, bacteria use various  
73 mechanisms to evade immune defenses and continue growing<sup>28;29</sup>. This phenomenon causes incessant activation  
74 of the immune responses namely inflammation, a signal that keeps the immune system continuously alert. For  
75 prevention of severe injury and tissue damage caused by the constant inflammatory signal, MDSCs get activated  
76 and expand systemically<sup>18</sup> to suppress the T cell activity. The MDSCs have direct contact with the T cells<sup>30</sup>,  
77 hampering the latter from expressing their full aggressive effect on bacteria. Bacteria are therefore not eliminated,  
78 but nevertheless cannot grow any further because T cells can still exert on them an extent of suppression. This  
79 leads to a non-growth and non-eradication of bacteria, and consequently the establishment of a stable equilibrium  
80 between the aforementioned three groups of cells. This equilibrium is generally known as a *S. aureus* chronic  
81 infection. A schematic representation of the model is illustrated in Fig. 1A.

### 82 Dynamics of chronic state establishment

83 To first validate model accuracy and consistency we reproduced the inverse proportional behaviour between T  
84 cells and MDSCs (Fig. S1). Analytical stability analysis and numerical analysis (Supplementary) showed how  
85 a *S. aureus* chronic infection is established in the absence of any treatment intervention (Fig. 1B and Fig. S2A).  
86 The onset of the infection induces strong inflammation, which activates T cells. The competition for dominance

87 between bacteria and T cells creates oscillations in the population dynamics (Fig. 1B). When inflammation be-  
88 comes long-lasting, MDSCs expand and suppress T cells. This dampens oscillations in both T cell and bacterial  
89 populations. However, increasing accumulation of MDSCs in the lymphoid organs, leads to increasing sup-  
90 pression on T cells ( $\Sigma$ ), which upon a critical threshold renders the infection non self-curable (Fig. 1D). As a  
91 consequence, the system reaches a steady state (Fig. 1C), the chronic infection, where bacteria persist in the  
92 host organism but are simultaneously unable to further grow due to their containment by T cells<sup>31</sup>. Once at this  
93 stage, sterilizing immunity can be attained only by using treatments, which destabilize (i.e. perturbate) the stable  
94 steady state of chronic infection.

## 95 **Model-driven therapeutic strategies for *Staphylococcus aureus* chronic infection**

96 To explore perturbation strategies that would destabilize the stable state of chronicity, we tested different values  
97 of  $k_b$  and  $\Sigma$ . These parameters were specifically chosen because they represent T-cell activation and recruitment,  
98 and T cell suppression by MDSCs, respectively, rates that are conventionally seen to play a key role to the  
99 establishment of chronic infection. Based on the eigenvalues of the ODE system (Eqs. (1)-(2)), we characterized  
100 the steady states as unstable and stable, and divided the separatrix (phase diagram) into cure and chronic infection  
101 regimes, respectively (Fig. 2A-2B).

102 Our next step was to determine the infected mouse's position in the phase diagram to suggest therapeutic  
103 strategies. Since not all infected mice are synchronized in the same infection phase, we found all possible  
104 positions of the infected organism in the phase diagram. All positions lied into the region of chronic infection  
105 (Fig. 2A-2B).

106 According to the separatrix of cure and chronic infection (Fig. 2A-2B), we concluded that the resolution  
107 of chronic infection is achieved by either (a) shifting the infected organism from the chronic infection regime  
108 (black area) to the cure regime (green area) or (b) by extending the cure regime itself (Fig. 2B). Relocation  
109 of the infected individual from the chronic infection region to cure is achieved by increasing T-cell activation  
110 and recruitment ( $k_b$ ) and/or by decreasing MDSC suppression on T cells ( $\Sigma$ ) (Fig. 2A). Furthermore, expansion  
111 of the cure zone (Fig. 2B) is achieved by counter-intuitively increasing the proliferation rate of bacteria ( $r_b$ )  
112 and/or by reducing bacteria's killing rate via immune cells ( $c_b$ ). Altogether the model indicates that all four  
113 aforementioned perturbation strategies would destabilize the chronic steady state in such way, that resolution of  
114 chronic infection, eradication of the bacteria, and *sterilizing immunity* would be achieved (Figs. 2C, S2B-S2D).

115 Experimental testing was essential to validate the model predictions. Boosting  $k_b$  *in vivo*, as suggested by the  
116 *in silico* predictions (Fig. 2C), could be achieved by introduction of heat-killed (HK) bacteria into the infected  
117 organism. The physiological  $k_b$  increase was incorporated into the model with the addition of a  $k_b \cdot B_d$  term in  
118 the T cells' ODE (Methods), where  $B_d$  the dose of HK injection and  $k_b$  the activation of immune system from  
119 HK bacteria assumed the same as for live bacteria (Table 1). Since our aim was to investigate a *S. aureus* chronic  
120 infection, the experimental perturbation had to be carried out after the 13th day of infection. The perturbation  
121 with HK bacteria was scheduled on the 14th day after initial infection with  $5 \times 10^7$  *S. aureus* cells. Numerical  
122 simulations suggested that the minimum dose needed for cure would be  $4 \times 10^7$  HK bacteria (Fig. S3). For our  
123 experiments, we opted for the amount of  $10^8$  HK cells.

124 To identify, on which day the infected mice would recover from infection and perform the sampling, we  
125 followed the simulations' results, which predicted sterilizing immunity on day 34.5 post-infection (Fig. 2C).  
126 However, taking into account the corresponding stochasticity of a biological system, the experimental sampling  
127 was set on the 37th day post-infection (Fig. 2C).

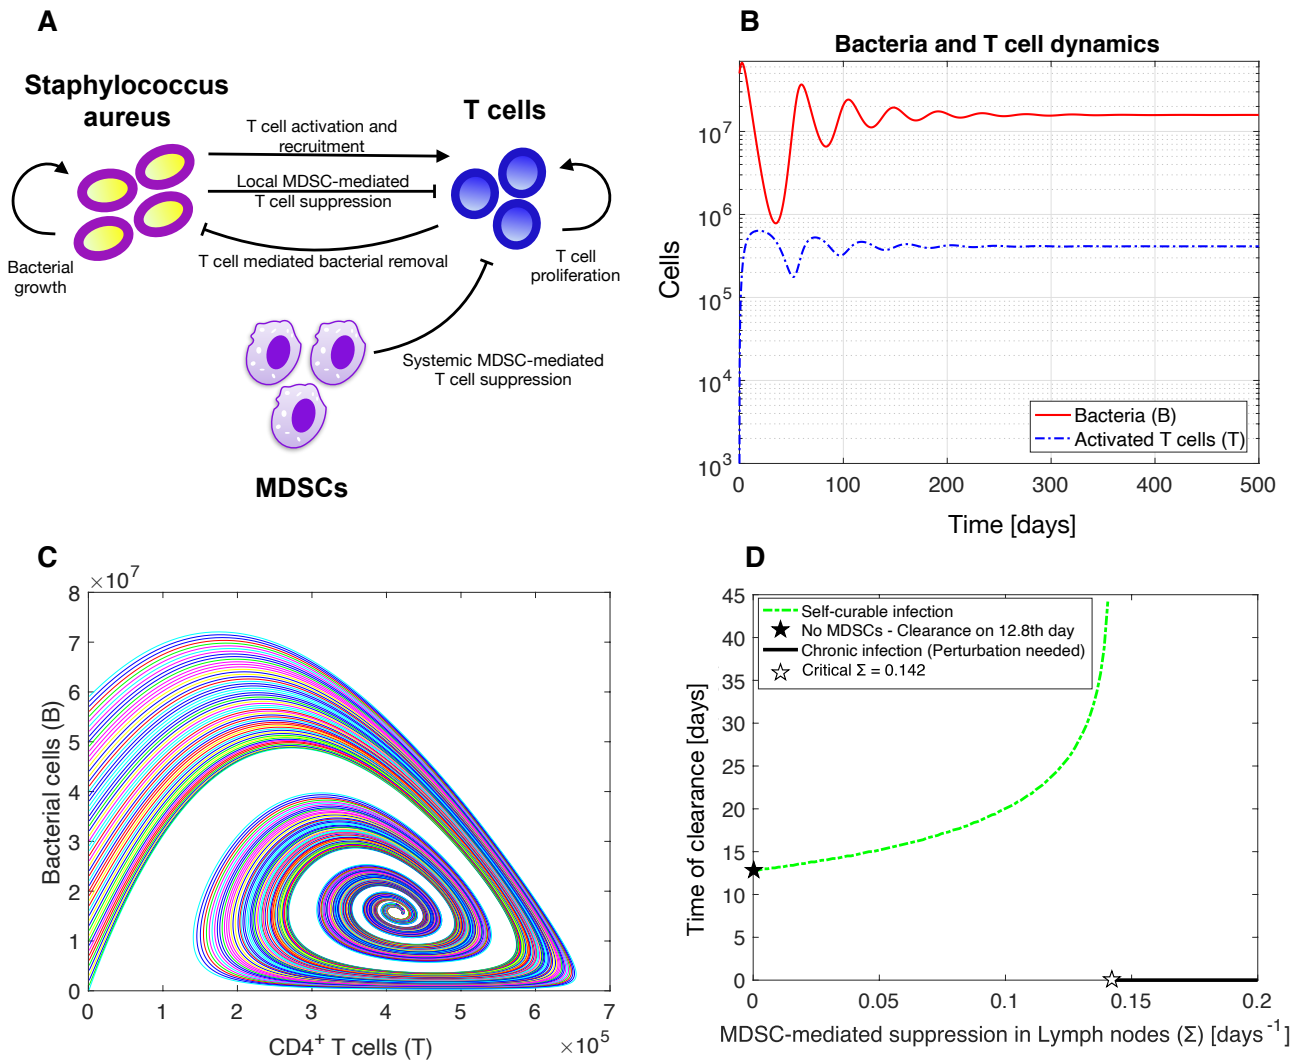

**Figure 1: Establishment of *S. aureus* chronic infection.** (A) Schematic representation of staphylococcal chronic infection model. After initial infection *S. aureus* cells proliferate in the host as  $r_b B(t)(1 - B(t)/\kappa)$ . Bacteria activate T cells as  $k_b B(t)$ , which proliferate as  $r_t T^2(t)$  and suppress bacteria as  $c_b T(t)B(t)$ . Once the bacterial infection becomes chronic, strong MDSC suppression on T cells takes place either locally as  $c_T B(t)T(t)$  or systemically as  $\Sigma \cdot T(t)$ . (B) Initiation of the infection in a previously healthy host causes strong inflammation, which rapidly activates T cells. Infection was induced by setting the bacterial population equal to  $5 \times 10^7$  cells on day 0 in Eq. (1). The oscillatory dynamics of bacteria (B) and activated T cells (T) in time are shown as numerical solutions of the ODE system (see Methods). (C) The interplay between bacteria and CD4<sup>+</sup> T cells leads to a stable steady state. For changing initial numbers of bacteria in the range  $[10^5, 6 \times 10^7]$  on day 0, the system always terminates in the stable equilibrium, which physiologically corresponds to the chronic infection. (D) Infection was initiated as in (B). The day of simulated clearance is shown for increasing values of  $\Sigma$  in the range  $[0, 0.2]$ , physiologically representing MDSC accumulation in the lymphoid organs and incremental T cell suppression by MDSCs. For changing value of the parameter  $\Sigma$  in the range  $[0, 0.2]$ , the ODE solver calculates the bacterial numbers. For bacterial numbers  $< 0.000001$ , the infection is considered cured (dashed line), else persisting (solid line). For resolved infections the corresponding day of clearance is shown, or set to zero for persisting (i.e. chronic) infections. The black star represents the scenario when MDSCs are absent and hence T-cell suppression does not exist ( $\Sigma = 0$ ). The white star represents the critical value of  $\Sigma$ , when the infection becomes persistent. The values for the rest of the model parameters are as shown in Table 1.

## 128 *In vivo* cure after model-driven perturbation treatment

129 Our mathematical model, described previously, incorporates the effect of MDSCs during a *S. aureus* chronic  
 130 infection. Its analysis provided perturbation strategies that showed sterilizing immunity *in silico*. We proceeded  
 131 to validate our *in silico* predictions *in vivo*. For this purpose, C57BL/6 mice were infected intravenously with *S.*

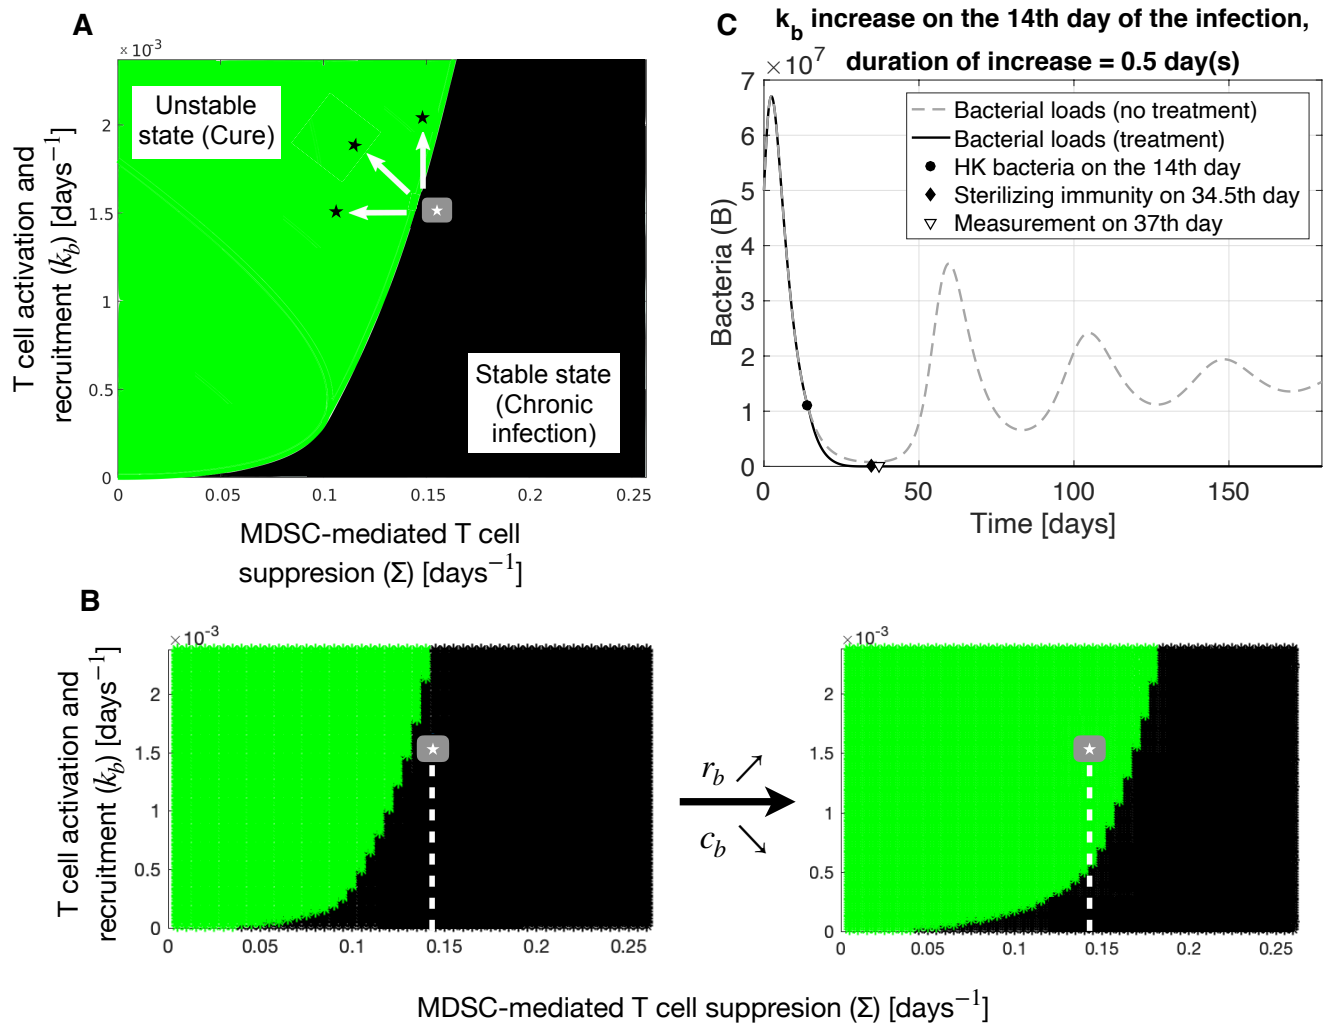

**Figure 2: (A-B) Phase diagram: Escaping from the state of chronic infection.** Based on the eigenvalues of the system, the phase diagram was divided into stable state (black) and unstable state (green), which represent the physiological chronic infection and cure, respectively. The white star represents the average position of the infected host during a chronic staphylococcal infection, which was determined by the values of parameters  $k_b$  and  $\Sigma$  as obtained from the fitting results (Table 1). The gray area (cloud) was created using the 95% confidence intervals of parameters  $k_b$  and  $\Sigma$  as obtained from the fitting results (Table 1) and represents possible positions of the infected mice in the separatrix. **(A)** Given that the state of infected hosts is as illustrated, it is obvious that mere increase of T cell activation and recruitment parameter  $k_b$  and/or decrease MDSC suppression on T cells  $\Sigma$  would shift the infected host into the green area of sterilizing immunity (black stars). **(B)** Increasing the cure regime (green) is achieved by utilizing counter-intuitive therapeutic ideas such as reduction of bacteria's killing rate via immune cells  $c_b$  and/or increasing the proliferation rate of bacteria  $r_b$ . Expansion of the cure area engulfs the infected host (white star), providing sterilizing immunity. **(C)** Increase of T-cell activation and recruitment parameter  $k_b$  confers sterilizing immunity from a *S. aureus* chronic infection *in silico*. Re-stimulation of the immune system is induced by administering  $10^8$  HK cells on the 14th day post-infection for a perturbation window that lasts half day (see Methods). Infection was induced by setting the bacterial population equal to  $5 \times 10^7$  cells on day 0 in Eq. (1).

132 *aureus* strain SH1000. On the 14th day post-infection mice received intraperitoneal injection with HK bacteria  
 133 of *S. aureus* strain SH10000 (Fig. 3A).

134 In a previous study<sup>31</sup>, it was shown that when C57BL/6 mice were infected with *S. aureus*, bacteria were  
 135 progressively depleted from multiple organs and persisted only in the kidneys. Therefore bacterial load quantifi-  
 136 cation was performed in mice's kidneys following the mathematical model's predictions (Fig. 2C).

### 137 **Complete bacterial clearance after heat-killed bacteria perturbation treatment**

138 Sampling on the 37th day post-infection validated the model's predictions. All mice, which had received the  
139 perturbation of HK *S. aureus* cells, achieved sterilizing immunity from *S. aureus* chronic infection (Fig. 3B). In  
140 contrast, the majority of control mice, which had only received PBS instead of HK bacteria were still infected  
141 with high bacterial burden (Fig. 3B).

### 142 **Recovery of T cell function**

143 Given the fact that progression of a *S. aureus* infection from acute to chronic renders T cells anergic<sup>31</sup>, our  
144 next step was to check the proliferative response of spleen T cells. Our results indicated that spleen T cells  
145 from treated mice were hyper-responsive to stimulation with anti-CD3 and anti-CD28 antibodies and actively  
146 proliferated (Fig. 3D). However, T cells of infected control mice, which had received PBS instead of HK bacteria,  
147 exhibited unresponsiveness to TCR re-stimulation (Fig. 3D).

### 148 **Reduction of MDSCs after heat-killed bacteria perturbation**

149 Interestingly, we found that the perturbation of the chronic system with HK bacteria did not only boost T cell  
150 function, but also aided in MDSC abatement. Flow cytometry revealed significant reduction of all MDSC subsets  
151 in mice's spleens, which had received HK bacteria (Fig. 3F). Reduction of MDSCs after treatment with heat-  
152 killed *S. aureus* was coupled with p-value of 0.0220 (\*) and 0.0004 (\*\*\*) for monocytic-like (M-MDSC) and  
153 neutrophilic-like (PMN-MDSC) MDSCs, respectively.

### 154 **Perturbation with *Streptococcus pyogenes* results in sterilizing immunity in half 155 of the infected mice's population**

156 To further elucidate whether the HK perturbation strategy elicits antigen-specific responses or not, we repeated  
157 the aforementioned experiments, initially infecting with *S. aureus* and treating with HK *Streptococcus pyogenes*  
158 (*S. pyogenes*) cells (Fig. 3A). In these experiments, measurements revealed complete clearance in 50% of the  
159 infected mice (Fig. 3C). By contrast, the majority of control mice remained infected. Additionally, T cells  
160 responded to stimulation with anti-CD3 and anti-CD28 antibodies only in cured mice (Fig. 3E). Nevertheless,  
161 flow cytometry illustrated reduction of MDSCs subsets in all HK-treated mice (Fig. 3G). Reduction of MDSCs  
162 after treatment with heat-killed *S. pyogenes* was coupled with p-value of 0.0296 (\*) and 0.0212 (\*) for monocytic-  
163 like (M-MDSC) and neutrophilic-like (PMN-MDSC) MDSCs, respectively.

164 Some diversity in the bacterial loads of control mice in all experiments was observed (Fig. 3B and 3C). All  
165 control mice (19 in total) were infected by *S. aureus* and only received PBS instead of the heat-killed treatment.  
166 It was observed that in five of them *S. aureus* was eradicated. Such behaviour is occasionally observed due to  
167 individual variation during the innate immune response in the acute phase of the infection.

168 To comprehend why half of infected mice were cured after HK *S. pyogenes* treatment (in contrast to HK *S.*  
169 *aureus* treatment), we simulated the HK dose and estimated day of clearance for different values of immuno-  
170 stimulatory parameter  $k_b$ . HK *S. pyogenes* cells stimulate the T cells to a lesser extent than the HK treatment  
171 with *S. aureus* cells, since the antigen for the latter had been encountered in the host upon initial infection. Our  
172 simulations indicated that 100% clearance of bacteria until the sampling day can possibly be conferred when  
173 higher *S. pyogenes* HK dose is administered (Fig. S4).

### 174 **HK treatments during established *S. aureus* chronic infection induce strong acute 175 inflammation**

176 Our experiments *in vivo* verified that the HK injection initiates acute inflammation during the chronic estab-  
177 lishment of *S. aureus* infection. In particular, peritoneal exudates were sampled 12 hours after HK treatment  
178 with *S. aureus* or *S. pyogenes* and showed massive increase in amounts of CD11b<sup>+</sup>Ly6C<sup>+</sup> monocytes and  
179 CD11b<sup>+</sup>Ly6G<sup>+</sup> granulocytes (neutrophils) in HK treated mice in comparison to the control mice, which had  
180 only received PBS (Fig. S5). Interestingly, in case of HK *S. aureus* treatment, which cured all infected hosts,

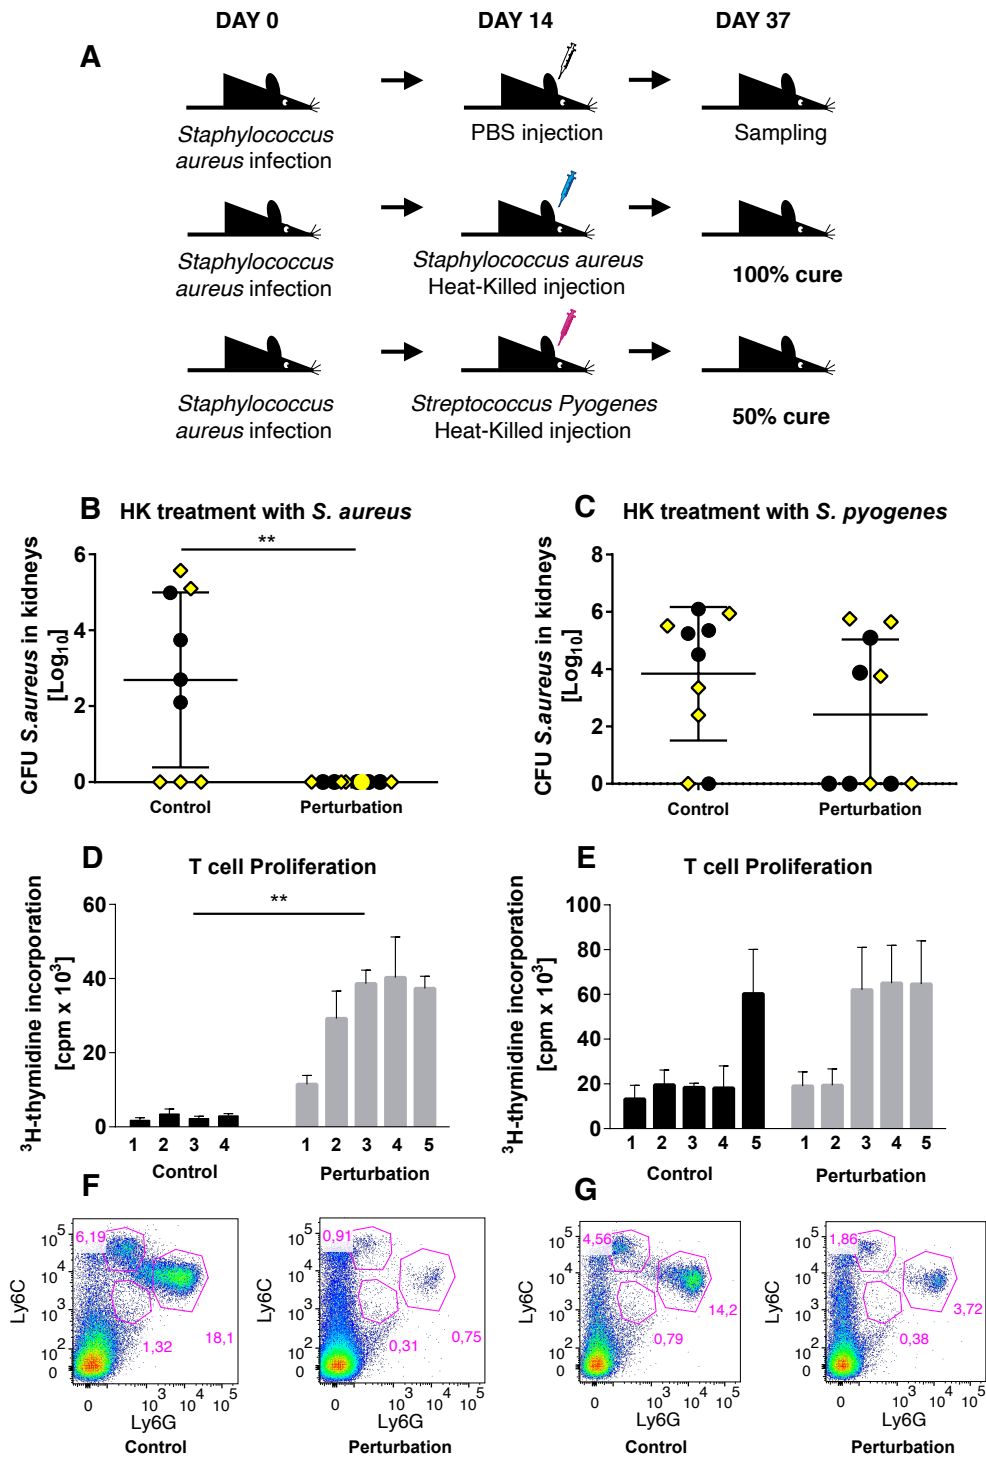

**Figure 3: Experimental set up, bacterial loads in kidneys, T cell proliferation and MDSC subsets.** (A) Experiments started on day 0 with IV injection of  $5 \times 10^7$  *S. aureus* cells. On day 14,  $10^8$  HK bacteria of *S. aureus* (B, D, F) or *S. pyogenes* (C, E, G) were injected intraperitoneally. On day 37 post-infection, sampling was conducted (Methods). Mice treated with HK bacteria injection accomplished sterilizing immunity (Methods). Success percentage was (B) 100% for treatment with HK *S. aureus* bacteria and (C) 50% for treatment with HK *S. pyogenes* bacteria. In contrast, bacteria in the majority of control mice's kidneys persisted. (D-E) T cells in uncured mice remained suppressed, while T cells in cured mice after treated with (D) HK *S. aureus* bacteria or (E) HK *S. pyogenes* bacteria recovered their proliferative function (Methods). The numbers 1-5 represent each individual mouse from either the control or HK (Perturbation) group. (F-G) Percentage of each MDSC subset (monocytic-like  $\text{CD11b}^+\text{Ly6C}^+\text{Ly6G}^{\text{low}}$  (M-MDSC), neutrophilic-like  $\text{CD11b}^+\text{Ly6C}^{\text{low}}\text{Ly6G}^+$  (PMN-MDSC), and eosinophilic-like  $\text{CD11b}^+\text{Ly6C}^{\text{low}}\text{Ly6G}^{\text{low}}$  (Eo-MDSC) MDSCs) in the spleens of mice that received PBS (Control) or HK (F) *S. aureus* and (G) *S. pyogenes* (Perturbation). All results were obtained from experiments in cohorts of five animals from two independent analyses represented by black bullets and yellow rhombuses.

181 CD11b<sup>+</sup>Ly6C<sup>+</sup> monocytes increased massively after the HK injection, whereas in case of HK *S. pyogenes* treat-  
182 ment, which cured half of the infected hosts, CD11b<sup>+</sup>Ly6G<sup>+</sup> granulocytes (neutrophils) increased massively  
183 after the HK injection (Fig. S5).

## 184 Reasoning for past unsuccessful applications of the treatment

185 Our model-driven protocol suggesting the HK dose, its administration day, and day of complete clearance has  
186 been proven reliable and effective. Even though administration of killed cells as treatment for infections has been  
187 used in the past, this kind of therapy has not been well established. This is due to lacking information regarding  
188 the HK dose needed and day(s) of administration that could resolve the infection successfully. At the moment  
189 all treatments involving inactivated bacteria have been based on vague experimental experience.

190 Here, we explain *in silico* why heat- or formalin-killed bacteria treatments used so far have not been success-  
191 ful in yielding clearance. We base our arguments on a previous study<sup>32</sup>, where scientists administered at least  
192 19 formalin-killed bacteria injections with increased dose over the period of 3 months in human patients with  
193 furunculosis.

194 In the study none of the chronically infected patients was reported to have attained sterilizing immunity, even  
195 though they experienced moderate to strong clinical improvement. The injecting scheme in the study consisted  
196 of increasing HK doses ( $B_d$ ) given in intervals of 3-5 days as following:

- 197 – Suspension I:  $(0.1, 0.2, 0.3, 0.4, 0.5) \times 5 \times 10^8$
- 198 – Suspension II:  $(0.3, 0.4, 0.5, 0.6, 0.7, 0.8, 0.9, 1) \times 10^9$
- 199 – Suspension III:  $(0.5, 0.6, 0.7, 0.8, 0.9, 1) \times 2.5 \times 10^9$ .

200 We assumed that the bacterial capacity in humans is 1000 times greater than the bacterial capacity in mice,  
201 created the corresponding murine suspensions:

- 202 – Suspension I:  $(0.1, 0.2, 0.3, 0.4, 0.5) \times 5 \times 10^5$
- 203 – Suspension II:  $(0.3, 0.4, 0.5, 0.6, 0.7, 0.8, 0.9, 1) \times 10^6$
- 204 – Suspension III:  $(0.5, 0.6, 0.7, 0.8, 0.9, 1) \times 2.5 \times 10^6$ ,

205 and applied them in our mouse model *in silico* every 4 days, starting from day 14, when chronic infection is  
206 established in mice.

207 The conventional administration of injections is based on the belief that repeated vaccination could work  
208 more efficiently. Here, we employed *in silico* the analogous protocol that has been used in humans and showed  
209 that repeated administration of injections with increasing dose cannot render eradication of the infective agent  
210 (Fig. 4, (A,B,C)). We also explored the case where repeated injections of fixed dose are given. However, even  
211 with high fixed doses the treatments still fail to eliminate the infection (Fig. 4, (D,E,F)). Our results explicitly  
212 negate the current belief by showing that challenging the system repeatedly and in high frequency intervals does  
213 not result in cure (Fig. 4).

214 We also correlated the HK dose, number of injections and intervals [days] between injections for HK doses  
215 from  $10^6$  to  $10^7$  (Fig. S6). Our *in silico* results suggested that the suspensions and intervals used in the study  
216 with furunculosis patients<sup>32</sup> were fruitless attempts towards bacterial clearance, since the administered HK doses  
217 in intervals of 3-5 days could not reactivate the hosts' immune systems in a sufficiently strong manner against  
218 bacteria (Fig. S6). We furthermore associated the HK dose, number of injections and intervals [days] between  
219 injections for HK doses from  $10^7$  to  $10^8$ . Our results clearly indicated that the longer the intervals between  
220 injections, the higher the HK doses required for cure and the lesser the probability for cure (Fig. S7).

221 Finally, we investigated how the administration time of a HK injection affects the clinical outcome. Even  
222 though treatments with low HK dose cannot confer complete clearance of bacteria, they can still alleviate the  
223 infection. In fact, administration of the treatment as early as possible, leads to longer remission of the infection  
224 (Fig. S8A). Lastly, for middle-doses the day of administration is crucial for the outcome of the infection, since it  
225 can provide cure if given as early as possible, or not affect the infection state (Fig. S8B).



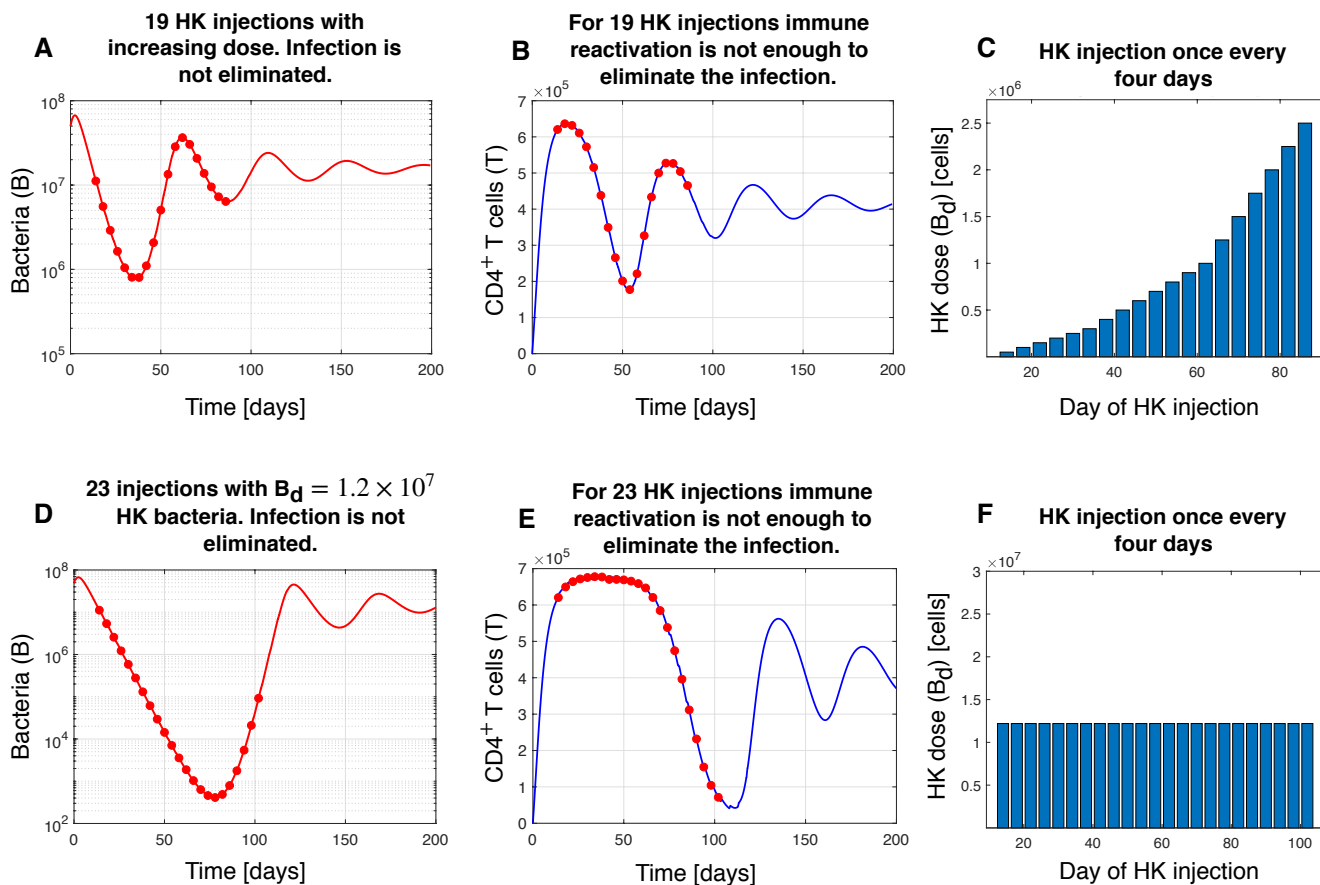

**Figure 4: Repeated administration of dead bacteria injections cannot render clearance.** (A, B, C) Nineteen HK bacteria injections are administered with increasing dose once every four days starting from day 14 post-infection in an analogous way as reported in humans. However, the infection still persists. (D, E, F) Twenty-three HK bacteria injections are administered with fixed dose once every four days starting from day 14 post-infection. The fixed dose is almost tenfold higher than the highest dose in the murine suspensions (i.e.  $2.5 \times 10^6$ ). Still, the infection persists.

## 226 Discussion

227 To date no treatment has proven completely effective in resolving *S. aureus* chronic infections. There is no  
 228 vaccine against *S. aureus* chronic infections because all clinical trials have failed<sup>33</sup>. The development of new  
 229 antibiotic drugs could be a solution, however likely a temporary one, until the bacterium develops anew mech-  
 230 anisms of resistance. Knowing what a plague *S. aureus* chronic infections are, also that a slew of people suffer  
 231 from such recalcitrant diseases, new ways of treatment are absolutely essential to find.

232 To escape the chronic phase of infection and result in sterilizing immunity, our model suggests four pertur-  
 233 bation strategies, two of which are counter-intuitive and one validated *in vivo*. The analysis of the mathematical  
 234 model suggests that by instantly heightening bacterial growth ( $r_b$ ), restricting bacterial killing by T cells ( $c_b$ ),  
 235 boosting the immune system ( $k_b$ ), and/or reducing MDSC-suppression on T cells ( $\Sigma$ ), the stable steady state of  
 236 established chronicity is perturbed and confers cure. The first two strategies would let bacteria grow in such  
 237 level that the immune system would be reactivated, allowing bacterial eradication and clearance. The last two  
 238 strategies are rather intuitive. In fact, targeting MDSCs<sup>34:35</sup> and boosting the immune system<sup>32</sup> have been shown  
 239 to favour bacterial reduction but nonetheless failed to induce sterilizing immunity in chronically infected indi-  
 240 viduals. However, although MDSC-depletion seems to be beneficial in diseases such as cancer<sup>36:37</sup>, in bacterial  
 241 infections such treatment would simultaneously deplete important monocytes and by extension, dendritic cells  
 242 and macrophages<sup>38</sup>.

243 Our model uses current knowledge in the field and refines it to foster complete clearance. All four suggested  
 244 perturbation strategies, even so different from each other, have a common factor: during a chronic infection they  
 245 initiate an acute inflammation, which instigates proinflammatory responses. Consequently, the immune system

246 is impelled to action, which further leads to alleviation of the infection or, given the adequate strength of stim-  
247 ulation, to sterilizing immunity. Our experiments *in vivo* verified that HK injection initiates acute inflammation  
248 during the chronic establishment of *S. aureus* infection, showing massive increase in amounts of CD11b<sup>+</sup>Ly6C<sup>+</sup>  
249 monocytes and CD11b<sup>+</sup>Ly6G<sup>+</sup> granulocytes (neutrophils) in HK treated mice (Fig. S5).

250 Blood samples taken twelve hours after the HK injections with *S. aureus* or *S. pyogenes* showed signifi-  
251 cant reduction of leukocytes, confirming the effect of the treatments. However, *S. aureus* HK treatment also  
252 reduced significantly monocytes, neutrophils, and platelets, in contrast to HK *S. pyogenes* treatment, verifying  
253 that HK treatment with *S. aureus* is more effective than with *S. pyogenes*. Change in lymphocyte numbers was  
254 insignificant after both treatments (data not shown).

255 For the experiments regarding antigen-specificity, *S. pyogenes* was chosen because together with *S. aureus*  
256 they are the two most common gram-positive cocci of medical significance<sup>39</sup>. Interestingly, HK administration  
257 of the *S. pyogenes* antigen, still cured half of the infected hosts. This could possibly happen as a result of trained  
258 immunity, a de facto immune memory of the innate immune system, which is believed to empower a stronger  
259 immune response upon a subsequent inflammatory stimulus<sup>40</sup>. To clarify this possibility, future work could be  
260 to experiment with infected mice deprived of T cells (e.g. Rag, SCID, or nude mice) and observe their response  
261 to our HK treatment protocols. The 50% sterilizing immunity in HK *S. pyogenes* treated mice (Fig. 3C) may  
262 also imply that a non-antigen specific HK perturbation should be combined with other perturbation strategies  
263 (antigen specific or not) to be completely effective. Nevertheless, our *in silico* results suggest that a higher HK *S.*  
264 *pyogenes* dose alone could have eliminated more MDSCs and hence could have reduced T cell suppression to a  
265 higher extent. The freed T cells would have then be able to exert their aggressive effect on bacteria and possibly  
266 also completely resolve the infection (Fig. S4). Future experiments could be conducted to test these hypotheses.

267 The hallmark of our model is that it can predict how each perturbation strategy may provide the sufficient  
268 intensity of stimulation that is necessary to yield complete clearance (Figs. 2C, S2-S3). Although the results  
269 of this study are limited to the specific mouse line of C57BL/6 female mice, the *in silico* results can be easily  
270 obtained when fitting the parameters of the mouse line or human of interest. This is because the model analysis  
271 was based on the model's non-dimensionalized form, which allows for the parameter values to change easily,  
272 before proceeding to the numerical analysis.

273 Applying treatment with HK bacteria has not only enhanced T cell activation, as we originally aimed and  
274 expected, but has also led to reduction of MDSCs and hence their inhibitory effect on T cells. Consequently, in  
275 the separatrix in Fig. 2A, the infected mouse condition did not improve by an upwardly vertical movement, as  
276 expected, but rather a diagonal left movement. This indicates that in bacterial infections autovaccination targets  
277 indirectly MDSCs, a fact that stayed until now unknown. It is hence likely that treated mice were cured some  
278 days before the scheduled sampling day. Future work could be to add a differential equation describing the  
279 population of MDSCs in time.

280 Additionally, we investigated why treatments using killed bacteria have not provided cure in the past. Heat-  
281 or formalin-killed bacteria treatments are narrowly established in medicine because there is no specific proto-  
282 col stating the exact dose, number of injections and time between injections that would guarantee sterilizing  
283 immunity. Our analysis suggested that numerous injections with increasing dose or fixed dose of killed cells  
284 cannot render cure (Fig. 4) if the dose given does not exceed the threshold of effective dose that is required for  
285 clearance. Interestingly our study demonstrated that sterilizing immunity can be achieved with just one or only  
286 a few injections with high dose of HK bacteria (Fig. S7). Our interpretation is that HK treatments lead to cure  
287 when they succeed in initiating a strong immune response. Multiple injections that contain a low HK dose do  
288 not accomplish a sufficient immune reactivation that can resolve the infection, even if they are administered over  
289 a long period of time.

290 Our proposed HK injection protocol verified experimentally that sterilizing immunity can be achieved by  
291 only one injection. However, according to our analysis more injections with a lesser HK dose could still result  
292 in sterilizing immunity, if the intervals between the injections are short (Figs. S6-S7). Furthermore, the shorter  
293 the interval between treatments, the quicker the cure is achieved (data not shown).

294 The model also suggests that the sequence of the injection dates plays a major role in the outcome of the  
295 infection. For injections containing equal HK doses administered in different days post-infection, the infection  
296 is resolved in one case but remains unresolved in the other case (Fig. S8). This indicates that escaping from the  
297 chronic state does not only depend on the HK dose itself but also depends on the day of administration of the HK  
298 injection. This result adds to the usefulness of our model, since such knowledge would be laboriously deduced,  
299 if at all, by mere experience.

300 It has been shown that *S. aureus* is becoming increasingly dangerous every year. It has been estimated that  
301 in 2001 *S. aureus* infections afflicted 292 045 US hospital inpatients, caused almost 12 000 inpatient deaths and  
302 cost \$9.5 billion in excess charges in US hospitals alone<sup>41</sup>. By 2014, the number of US inpatients afflicted with  
303 Methicillin-Susceptible and Methicillin-Resistant *S. aureus* alone has risen dramatically to 616 070 individuals  
304 and associated costs were estimated to be around \$14.6 billion<sup>42</sup>. Therefore finding new treatments against  
305 *S. aureus* infections is absolutely essential. Taken together, our study provides protocols for safe treatments  
306 and cure and can be translated as a strong basis for developing treatment protocols against *S. aureus* chronic  
307 infections in humans.

## 308 Methods

### 309 Mathematical model

The mathematical model applies to the chronic, non-acute infections caused by *S. aureus*. It comprises of currently known interactions between bacteria  $B(t)$ , T cells  $T(t)$  and MDSCs  $\Sigma$ .

The ODE system reads

$$\dot{B}(t) = r_b B(t) \left(1 - \frac{B(t)}{\kappa}\right) - c_b T(t) B(t), \quad (1)$$

$$\dot{T}(t) = r_t T^2(t) + k_b B(t) - c_T B(t) T(t) - \Sigma \cdot T(t). \quad (2)$$

310 Immunosuppression driven by MDSCs can be achieved in two ways. On the one hand, the bacterium can activate  
311 the MDSCs, which are resident in the site of infection. This is expressed with the term  $c_T B(t) T(t)$  and implies the  
312 *local* immunosuppression by MDSCs. On the other hand, the activation and expansion of MDSCs can take place  
313 *systemically*, as a generic protective mechanism of the organism against long-lasting strong inflammation or as  
314 a mechanism of the bacteria for persistence. This is represented with the term  $\Sigma \cdot T(t)$ , since MDSC-mediated  
315 immunosuppression on T cells requires direct cell–cell contact or cell–cell proximity<sup>30:43</sup>. T cell proliferation is  
316 represented by the term  $r_t T^2(t)$ . This is because activated T cells secrete Interleukin 2 (IL-2), which induces cell  
317 cycle progression of T cells. In return, it creates a positive feedback loop for T cell proliferation, and hence the  
318 term  $r_t T^2(t)$ . The parameter  $r_b$  represents the proliferation rate of bacteria in the presence of the innate immunity  
319 phenomonologically capturing control of bacterial expansion by logistic growth. The term  $c_b T(t) B(t)$  represents  
320 the T-helper mediated killing rate of bacteria, since the concentration of effector CD4<sup>+</sup> T cells is pivotal to the  
321 killing efficacy of actual effector cells, such as macrophages. In murine models of *S. aureus* renal abscesses it has  
322 been shown that the infection progresses towards chronicity is due to the gradual loss of functionality of effector  
323 CD4<sup>+</sup> T cells<sup>31</sup>. In the following the term T cells will refer to the effector CD4<sup>+</sup> T cells unless otherwise stated.  
324 The mathematical model was implemented and simulated in MATLAB, see [www.mathworks.com](http://www.mathworks.com).

### 325 Fitting curves and standard deviation of parameters

The unknown parameters in the model were estimated in three steps. First, the carrying capacity of bacteria  $\kappa$  was estimated based on the data reported in Fig. 5A<sup>31</sup>, where *S. aureus* infected Rag-deficient mice showed nearly constant level of *S. aureus* in kidney from day 7 till day 56. The mean of these data points was taken as the carrying capacity. Secondly, the growth rate of bacteria was estimated by solving the logistic growth equation

$$r = \frac{\ln\left(\frac{P(\kappa - P_0)}{P_0(\kappa - P)}\right)}{t}$$

326 where  $\kappa$  is the carrying capacity,  $P_0$  is the initial inoculation number of bacteria and  $P$  is the bacterial CFU at  
327 time  $t$ . Our previous experimental data showed that the bacterial loads in Rag-deficient mice reached 75% of the  
328 carrying capacity on day 2 and fluctuated afterwards, after intravenous inoculation with  $7 \times 10^7$  CFU *S. aureus*.  
329 Assuming that bacterial load reached 75% of the carrying capacity by day 1 or day 2, we determined the high  
330 and low boundary of  $r_b$  to be 0.636 and 0.318, respectively. The average of the low and high boundary was  
331 taken as the bacterial growth rate in the next step. Finally, the rest of the unknown parameters were estimated  
332 by fitting the data reported in Fig. 8B<sup>31</sup>, where the absolute number of CD4+ T cells in peripheral lymph

333 nodes was monitored. The fitting process used a Markov Chain Monte Carlo version of Differential Evolution  
 334 algorithm<sup>44</sup>. Parameter  $c_T$  appeared much smaller than other parameters in the initial investigation. We tested, in  
 335 a second study, the possibility of fitting the same data with  $c_T = 0$ . The fit quality remained the same, therefore  
 336 we concluded that  $c_T$  is zero. This deduction accords with experimental reports which show Extramedullary  
 337 Haematopoiesis (EH) during persistent infections<sup>45</sup>. Fitting curves are shown in Fig. S9 and fitted parameter  
 338 values in Table 1.

| Parameter | Description                                                | Value, [Confidence interval]                                                | Unit               |
|-----------|------------------------------------------------------------|-----------------------------------------------------------------------------|--------------------|
| $r_b$     | Bacterial growth rate (in the presence of innate immunity) | 0.477                                                                       | days <sup>-1</sup> |
| $\kappa$  | Carrying capacity of bacteria                              | $1.132 \times 10^8$                                                         | cells              |
| $c_b$     | T cell-mediated killing rate of bacteria (per cell)        | $9.937 \times 10^{-7}$ , [ $8.65 \times 10^{-7}$ , $1.25 \times 10^{-6}$ ]  | days <sup>-1</sup> |
| $r_t$     | T cell proliferation rate (per cell)                       | $2.0955 \times 10^{-7}$ , [ $1.04 \times 10^{-7}$ , $2.94 \times 10^{-7}$ ] | days <sup>-1</sup> |
| $k_b$     | T cell activation and recruitment rate                     | 0.001509, [0.0011, 0.0017]                                                  | days <sup>-1</sup> |
| $c_T$     | Local T cell suppression rate (per cell)                   | 0                                                                           | days <sup>-1</sup> |
| $\Sigma$  | MDSC-mediated suppression rate                             | 0.14393, [0.072, 0.18]                                                      | days <sup>-1</sup> |

**Table 1:** Model parameter values as used for model analysis. In square brackets is the 95% confidence interval of the parameters as derived by a Markov Chain Monte Carlo version of Differential Evolution algorithm<sup>44</sup>.

### 339 Simulating the perturbation treatment

340 To simulate the perturbation strategy, we incorporated for a perturbation window (e.g. 12 hours) another term  
 341  $k_b \cdot B_d$  or  $B_d$  into the ODE describing T cells (Eq. (2)), where  $B_d = 10^8$  cells is the dose of heat-killed bacteria  
 342 and  $k_b = 0.001509$  [days<sup>-1</sup>] as estimated during the fitting process (Table 1). However, since the new term  
 343 describes the addition of bacteria, despite them being inactivated, one would suggest that the term should be  
 344 incorporated into the bacterial ODE. One would also argue that addition of heat-killed bacteria would initiate an  
 345 acute inflammation, and hence result in reduction of MDSCs, which are associated with chronic infections. To  
 346 eliminate all doubts about the model's predictions and robustness, we integrated the term in all three suggested  
 347 locations in ODEs as shown below.

If heat-killed bacteria treatment is integrated in the T cell ODE

$$\begin{aligned} \dot{B}(t) &= r_b B(t) - \frac{r_b}{\kappa} B^2(t) - c_b T(t) B(t), \\ \dot{T}(t) &= r_t T^2(t) + k_b B(t) - c_T B(t) T(t) - \Sigma \cdot T(t) + k_b \cdot B_d, \end{aligned} \quad (3)$$

348 then cure is expected by day 34.5.

349

If heat-killed bacteria treatment is integrated in the bacterial ODE

$$\begin{aligned} \dot{B}(t) &= r_b B(t) - \frac{r_b}{\kappa} B^2(t) - c_b T(t) B(t) + B_d, \\ \dot{T}(t) &= r_t T^2(t) + k_b B(t) - c_T B(t) T(t) - \Sigma \cdot T(t), \end{aligned}$$

350 then cure is expected by day 29.6.

351

If heat-killed bacteria treatment diminishes the MDSC effect

$$\begin{aligned} \dot{B}(t) &= r_b B(t) - \frac{r_b}{\kappa} B^2(t) - c_b T(t) B(t), \\ \dot{T}(t) &= r_t T^2(t) + k_b B(t) - c_T B(t) T(t) - (\Sigma - B_d) \cdot T(t), \end{aligned}$$

352 then cure is expected by day 14.15.

353

354 All of them revealed eradication of bacterial cells by day 37 post-infection, the experimental measurement day.  
 355 The perturbation strategy of the  $k_b$  increase, as shown in this study, was simulated utilizing the equations (3).

## 356 **Experimental protocols**

### 357 **Bacteria**

358 *S. aureus* strain SH1000<sup>46</sup> was grown to Mid-Log phase in brain heart infusion medium (BHI, Roth, Karl-  
359 sruhe, Germany) at 37°C with shaking (120 rpm), collected by centrifugation, washed with sterile PBS, and  
360 diluted to the required concentration. The number of viable bacteria was determined after serial diluting and  
361 plating on BHI-agar.

### 362 **Mice and infection**

363 A previously described chronic renal abscess infection model<sup>31</sup> has been used in this study. Pathogen-free,  
364 10 weeks-old C57BL/6 female mice were purchased from Harlan-Winkelmann (Envigo, Netherlands). All ani-  
365 mals were provided with food and water ad libitum, and housed in groups of up to 5 mice per cage in individually  
366 ventilated cages. Mice were infected with  $5 \times 10^7$  CFU of *S. aureus* in 100  $\mu$ l of PBS via a tail vein and mon-  
367 itored on a daily basis for weight loss and sign of pain or distress. At specified times of infection, mice were  
368 sacrificed by CO<sub>2</sub> asphyxiation and the bacterial load was enumerated in kidney homogenates by plating 10-fold  
369 serial dilutions on blood agar plates. Spleens were removed, transformed in a single cell suspension and further  
370 processed for FACS and proliferation assays.

371 Blood samples were collected with EDTA-treated tubes and the differential blood count was done with 50  
372  $\mu$ l of blood using a VetScan HM5 Hematology Analyzer (Abaxis).

373 In vaccination experiments, infected mice were injected intraperitoneally at day 14 of infection with 10<sup>8</sup>  
374 heat-killed bacteria of *S. aureus* strain SH1000 or *S. pyogenes* strain A20 in 200  $\mu$ l of PBS that were prepared  
375 by heating a bacterial suspension at 60°C for 1 h. At 12 h postchallenge, mice were sacrificed and peritoneal  
376 exudate cells (PEC) were isolated from infected mice by lavage of the peritoneal cavity with 2 ml sterile PBS.  
377 The lavage fluid was centrifuged, supernatants stored at -20°C for subsequent cytokine analysis, and PEC resus-  
378 pended in complete RPMI, stained and analyzed by flow cytometry (see below).

379 Animal experiments were performed in strict accordance with the German regulations of the Society for Lab-  
380 oratory Animal Science (GV- SOLAS) and the European Health Law of the Federation of Laboratory Animal  
381 Science Associations (FELASA). All experiments were approved by the ethical board Niedersächsisches Lan-  
382 desamt für Verbraucherschutz und Lebensmittelsicherheit, Oldenburg, Germany (LAVES; permit N. 18/2798).

### 383 **Flow cytometry analysis**

384 Cells were incubated with purified rat anti-mouse CD16/CD32 (BD Biosciences) for 5 min to block Fc  
385 receptors and then stained with antibodies against CD11b (BioLegend), Ly6C (BioLegend), Ly6G (Miltenyi  
386 Biotec) for 20 min at 4°C. Labeled cells were measured by flow cytometry using a BDTM LSR II flow cytometer  
387 (BD Biosciences) and analyzed by FlowJo software.

### 388 **Proliferation assay**

389 Spleen cells were seeded into 96-well flat-bottom plates at  $5 \times 10^5$  cells/well in 100  $\mu$ l of complete RPMI  
390 medium and stimulated with 2  $\mu$ g/ml of anti-CD3/anti-CD28 antibodies (Sigma-Aldrich) at 37°C and 5% CO<sub>2</sub>.  
391 After 3 days of incubation, the cells were pulsed with 1  $\mu$ Ci <sup>3</sup>H-thymidine (Amersham) and harvested 18 h  
392 later on Filtermats A (Wallac) using a cell harvester (Inotech). The amount of <sup>3</sup>H-thymidine incorporation was  
393 measured in a gamma scintillation counter (Wallac 1450; MicroTrilux).

### 394 **Statistical analyses**

395 All data were analyzed with GraphPad Prism 7.0. Comparisons between several groups were made using  
396 a parametric ANOVA test with Tukey post-test multiple comparison test. Comparison between two groups was  
397 performed using a t-test. P values < 0.05 were considered significant.

## 398 Authors' Contributions

399 LAP, HH, SK, GZ, and MMH designed the study, developed the methodology and interpreted the results. GZ  
400 performed the fitting process. LAP performed the model implementation and simulations, and analyzed the  
401 results. LAP and EM designed and conducted the experiments. LAP, KKD and IS analyzed the experimental  
402 results. HH and MMH supervised the study. All authors wrote the paper and approved the final version of the  
403 manuscript.

## 404 Acknowledgements

405 LAP was supported by the German Federal Ministry of Education and Research within the initiative e:Med-  
406 network of systems-medicine, project MultiCellML (FKZ: 01ZX01707C). SK was supported by the German  
407 Federal Ministry of Education and Research within the Measures for the Establishment of Systems Medicine,  
408 project SYSIMIT (BMBF eMed project SYSIMIT, FKZ: 01ZX1308B and by the Helmholtz Association, Zukun-  
409 ftsthema "Immunology and Inflammation" (ZT-0027). GZ was supported by the Helmholtz Association within  
410 the initiative Immunology and Inflammation, project "Aging and Metabolic Programming" (AMPro). HH was  
411 supported by the Helmholtz Initiative on Personalized Medicine - iMed. The authors thank Sabine Lehne and  
412 Lothar Gröbe for excellent technical assistance, and Anna Ntalli, Heiko Enderling and Andreas Papaxenopoulos  
413 for useful comments on a draft of this article.

## 414 References

- 415 [1] Vichitra Sukumaran and Sanjaya Senanayake. Bacterial skin and soft tissue infections. *Australian pre-*  
416 *scriber*, 39(5):159, 2016.
- 417 [2] Sarah A Horst, Verena Hoerr, Andreas Beineke, Carolin Kreis, Lorena Tuchscher, Julia Kalinka, Sabine  
418 Lehne, Ina Schleicher, Gabriele Köhler, Thomas Fuchs, et al. A novel mouse model of staphylococcus  
419 aureus chronic osteomyelitis that closely mimics the human infection: an integrated view of disease patho-  
420 genesis. *The American journal of pathology*, 181(4):1206–1214, 2012.
- 421 [3] Kuo-Ti Peng, Ching-Chuan Hsieh, Tsung-Yu Huang, Pei-Chun Chen, Hsin-Nung Shih, Mel S Lee, and  
422 Pey-Jium Chang. Staphylococcus aureus biofilm elicits the expansion, activation and polarization of  
423 myeloid-derived suppressor cells in vivo and in vitro. *PLoS one*, 12(8):e0183271, 2017.
- 424 [4] K Hiramatsu, Y Katayama, M Matsuo, T Sasaki, Y Morimoto, A Sekiguchi, and T Baba. Multi-  
425 drug-resistant staphylococcus aureus and future chemotherapy. *Journal of Infection and Chemotherapy*,  
426 20(10):593–601, 2014.
- 427 [5] Vilasack Thammavongsa, Hwan Keun Kim, Dominique Missiakas, and Olaf Schneewind. Staphylococcal  
428 manipulation of host immune responses. *Nature Reviews Microbiology*, 13(9):529–543, 2015.
- 429 [6] James Collins, Angus Buckling, and Ruth C Massey. Identification of factors contributing to t-cell toxicity  
430 of staphylococcus aureus clinical isolates. *Journal of clinical microbiology*, 46(6):2112–2114, 2008.
- 431 [7] C. Tebartz, S.A. Horst, T. Sparwasser, J. Huehn, A. Beineke, G. Peters, and E. Medina. A major role  
432 for myeloid-derived suppressor cells and a minor role for regulatory T cells in immunosuppression during  
433 Staphylococcus aureus infection. *J. Immunol.*, 194(3):1100–1111, 2015.
- 434 [8] Anca Dorhoi and Nelita Du Plessis. Monocytic myeloid-derived suppressor cells in chronic infections.  
435 *Frontiers in immunology*, 8:1895, 2018.
- 436 [9] Oliver Goldmann, Andreas Beineke, and Eva Medina. Identification of a novel subset of myeloid-derived  
437 suppressor cells during chronic staphylococcal infection that resembles immature eosinophils. *The Journal*  
438 *of infectious diseases*, 216(11):1444–1451, 2017.

- 439 [10] Je-In Youn and Dmitry I Gabrilovich. The biology of myeloid-derived suppressor cells: the blessing and  
440 the curse of morphological and functional heterogeneity. *European journal of immunology*, 40(11):2969–  
441 2975, 2010.
- 442 [11] Eva Medina and Dominik Hartl. Myeloid-derived suppressor cells in infection: A general overview. *Jour-*  
443 *nal of innate immunity*, pages 1–7, 2018.
- 444 [12] Michael Ost, Anurag Singh, Andreas Peschel, Roman Mehling, Nikolaus Rieber, and Dominik Hartl.  
445 Myeloid-derived suppressor cells in bacterial infections. *Frontiers in cellular and infection microbiology*,  
446 6, 2016.
- 447 [13] Thomas Vollbrecht, Renate Stirner, Amanda Tufman, Julia Roider, Rudolf M Huber, Johannes R Bogner,  
448 Andreas Lechner, Carole Bourquin, and Rika Draenert. Chronic progressive hiv-1 infection is associated  
449 with elevated levels of myeloid-derived suppressor cells. *Aids*, 26(12):F31–F37, 2012.
- 450 [14] Gang Ning, Lanhui She, Lirong Lu, Ying Liu, Yingfu Zeng, Ying Yan, and Chaoshuang Lin. Analysis  
451 of monocytic and granulocytic myeloid-derived suppressor cells subsets in patients with hepatitis c virus  
452 infection and their clinical significance. *BioMed research international*, 2015, 2015.
- 453 [15] Laura Strauss, Sabina Sangaletti, Francesca Maria Consonni, Gabor Szebeni, Sara Morlacchi, Maria Grazia  
454 Totaro, Chiara Porta, Achille Anselmo, Silvia Tartari, Andrea Doni, et al. Rorc1 regulates tumor-promoting  
455 “emergency” granulo-monocytopenia. *Cancer Cell*, 28(2):253–269, 2015.
- 456 [16] Ehsan Malek, Marcos de Lima, John J Letterio, Byung-Gyu Kim, James H Finke, James J Driscoll, and  
457 Sergio A Giralt. Myeloid-derived suppressor cells: The green light for myeloma immune escape. *Blood*  
458 *reviews*, 30(5):341–348, 2016.
- 459 [17] Chunqing Guo, Fanlei Hu, Huanfa Yi, Zhitao Feng, Changzheng Li, Lianjie Shi, Yingni Li, Hongjiang Liu,  
460 Xiaofei Yu, Hongxia Wang, et al. Myeloid-derived suppressor cells have a proinflammatory role in the  
461 pathogenesis of autoimmune arthritis. *Annals of the rheumatic diseases*, 75(1):278–285, 2016.
- 462 [18] Jun Dai, Mohamed El Gazzar, Guang Y Li, Jonathan P Moorman, and Zhi Q Yao. Myeloid-derived  
463 suppressor cells: paradoxical roles in infection and immunity. *Journal of innate immunity*, 7(2):116–126,  
464 2015.
- 465 [19] RN Zadoks, HG Allore, TJ Hagenaaers, HW Barkema, and YH Schukken. A mathematical model of  
466 staphylococcus aureus control in dairy herds. *Epidemiology and infection*, 129(02):397–416, 2002.
- 467 [20] Tian Ding, Young-Hwan Shim, Na-Jung Choi, Sang-Do Ha, Myung-Sub Chung, In-Gyun Hwang, and  
468 Deog-Hwan Oh. Mathematical modeling on the growth of staphylococcus aureus in sandwich. *Food*  
469 *Science and Biotechnology*, 19(3):763–768, 2010.
- 470 [21] Heeyoung Lee, Kyungmi Kim, Soomin Lee, Minkyung Han, and Yohan Yoon. Growth kinetics of staphy-  
471 lococcus aureus on brie and camembert cheeses. *Journal of Dairy Research*, 81(02):252–256, 2014.
- 472 [22] Emily Kajita, Justin T Okano, Erin N Bodine, Scott P Layne, and Sally Blower. Modelling an outbreak of  
473 an emerging pathogen. *Nature Reviews Microbiology*, 5(9):700–709, 2007.
- 474 [23] C Hogeia, T Van Effelterre, and CJ Acosta. A basic dynamic transmission model of staphylococcus aureus  
475 in the us population. *Epidemiology & Infection*, 142(3):468–478, 2014.
- 476 [24] ES McBryde, AN Pettitt, and DLS McElwain. A stochastic mathematical model of methicillin resistant  
477 staphylococcus aureus transmission in an intensive care unit: predicting the impact of interventions. *Jour-*  
478 *nal of Theoretical Biology*, 245(3):470–481, 2007.
- 479 [25] Xiaoxia Wang, Sarada Panchanathan, and Gerardo Chowell. A data-driven mathematical model of ca-  
480 mrsa transmission among age groups: evaluating the effect of control interventions. *PLoS Comput Biol*,  
481 9(11):e1003328, 2013.

- 482 [26] Erica D'Agata, Glenn F Webb, Mary Ann Horn, Robert C Moellering, and Shigui Ruan. Modeling the inva-  
483 sion of community-acquired methicillin-resistant staphylococcus aureus into hospitals. *Clinical Infectious*  
484 *Diseases*, 48(3):274–284, 2009.
- 485 [27] Alfonso J Rodriguez-Morales, Cruz N Rodriguez, Ada Garcia, Ivette Jimenez, Bileida Pastran, and Pilar  
486 Meijomil. Surveillance analysis of decreasing susceptibility of staphylococcus aureus to vancomycin using  
487 a mathematical model. *International journal of antimicrobial agents*, 29(5):607–609, 2007.
- 488 [28] Hwan Keun Kim, Vilasack Thammavongsa, Olaf Schneewind, and Dominique Missiakas. Recurrent infec-  
489 tions and immune evasion strategies of staphylococcus aureus. *Current opinion in microbiology*, 15(1):92–  
490 99, 2012.
- 491 [29] B. Brett Finlay and Grant McFadden. Anti-Immunology: Evasion of the Host Immune System by Bacterial  
492 and Viral Pathogens. *Cell*, 124(4):767–782, 2006.
- 493 [30] Christina Tebartz, Sarah Anita Horst, Tim Sparwasser, Jochen Huehn, Andreas Beineke, Georg Peters, and  
494 Eva Medina. A major role for myeloid-derived suppressor cells and a minor role for regulatory t cells in  
495 immunosuppression during staphylococcus aureus infection. *The Journal of Immunology*, 194(3):1100–  
496 1111, 2015.
- 497 [31] Christina Ziegler, Oliver Goldmann, Elias Hobeika, Robert Geffers, Georg Peters, and Eva Medina. The  
498 dynamics of t cells during persistent staphylococcus aureus infection: from antigen-reactivity to in vivo  
499 anergy. *EMBO molecular medicine*, 3(11):652–666, 2011.
- 500 [32] Silva Holtfreter, Joanna Jursa-Kulesza, Helena Masiuk, NJ Verkaik, Corné de Vogel, Julia Kolata, Monika  
501 Nowosiad, Leif Steil, Willem van Wamel, Alex van Belkum, et al. Antibody responses in furunculosis  
502 patients vaccinated with autologous formalin-killed staphylococcus aureus. *European Journal of Clinical*  
503 *Microbiology & Infectious Diseases*, 30(6):707, 2011.
- 504 [33] Dominique Missiakas and Olaf Schneewind. Staphylococcus aureus vaccines: Deviating from the carol.  
505 *Journal of Experimental Medicine*, 213(9):1645–1653, 2016.
- 506 [34] Cortney E Heim, Debbie Vidlak, and Tammy Kielian. Interleukin-10 production by myeloid-derived sup-  
507 pressor cells contributes to bacterial persistence during staphylococcus aureus orthopedic biofilm infection.  
508 *Journal of leukocyte biology*, 98(6):1003–1013, 2015.
- 509 [35] Cortney E Heim, Debbie Vidlak, Tyler D Scherr, Curtis W Hartman, Kevin L Garvin, and Tammy Kielian.  
510 Il-12 promotes myeloid-derived suppressor cell recruitment and bacterial persistence during staphylococ-  
511 cus aureus orthopedic implant infection. *The Journal of Immunology*, 194(8):3861–3872, 2015.
- 512 [36] Viktor Fleming, Xiaoying Hu, Rebekka Weber, Vasyl Nagibin, Christopher Groth, Peter Altevogt, Jochen  
513 Utikal, and Viktor Umansky. Targeting myeloid-derived suppressor cells to bypass tumor-induced im-  
514 munosuppression. *Frontiers in immunology*, 9:398, 2018.
- 515 [37] Livingstone Fultang, Silvia Panetti, Margaret Ng, Paul Collins, Suzanne Graef, Nagy Rizkalla, Sarah  
516 Booth, Richard Lenton, Boris Noyvert, Claire Shannon-Lowe, et al. Mdsctargeting with gemtuzumab  
517 ozogamicin restores t cell immunity and immunotherapy against cancers. *EBioMedicine*, 2019.
- 518 [38] Cortney E Heim, Debbie Vidlak, Tyler D Scherr, Jessica A Kozel, Melissa Holzapfel, David E Muirhead,  
519 and Tammy Kielian. Myeloid-derived suppressor cells contribute to staphylococcus aureus orthopedic  
520 biofilm infection. *The Journal of Immunology*, 192(8):3778–3792, 2014.
- 521 [39] Tomas Fiedler, Thomas Köller, and Bernd Kreikemeyer. Streptococcus pyogenes biofilms—formation,  
522 biology, and clinical relevance. *Frontiers in cellular and infection microbiology*, 5:15, 2015.
- 523 [40] Willem JM Mulder, Jordi Ochando, Leo AB Joosten, Zahi A Fayad, and Mihai G Netea. Therapeutic  
524 targeting of trained immunity. *Nature Reviews Drug Discovery*, page 1, 2019.



- 525 [41] Gary A Noskin, Robert J Rubin, Jerome J Schentag, Jan Kluytmans, Edwin C Hedblom, Maartje Smulders,  
526 Elizabeth Lapetina, and Eric Gemmen. The burden of staphylococcus aureus infections on hospitals in the  
527 united states: an analysis of the 2000 and 2001 nationwide inpatient sample database. *Archives of internal*  
528 *medicine*, 165(15):1756–1761, 2005.
- 529 [42] Eili Y Klein, Wendi Jiang, Nestor Mojica, Katie K Tseng, Ryan McNeill, Sara E Cosgrove, and Trish M  
530 Perl. National costs associated with methicillin-susceptible and methicillin-resistant staphylococcus aureus  
531 hospitalizations in the united states, 2010–2014. *Clinical Infectious Diseases*, 68(1):22–28, 2018.
- 532 [43] Dmitry I Gabrilovich and Srinivas Nagaraj. Myeloid-derived suppressor cells as regulators of the immune  
533 system. *Nature Reviews Immunology*, 9(3):162–174, 2009.
- 534 [44] Cajo JF Ter Braak. A markov chain monte carlo version of the genetic algorithm differential evolution:  
535 easy bayesian computing for real parameter spaces. *Statistics and Computing*, 16(3):239–249, 2006.
- 536 [45] Chang H Kim. Homeostatic and pathogenic extramedullary hematopoiesis. *Journal of blood medicine*,  
537 1:13, 2010.
- 538 [46] Marie Jonsson, Staffan Arvidson, Simon Foster, and Andrzej Tarkowski. Sigma factor b and rsbu are  
539 required for virulence in staphylococcus aureus-induced arthritis and sepsis. *Infection and immunity*,  
540 72(10):6106–6111, 2004.

## 541 Supplementary material

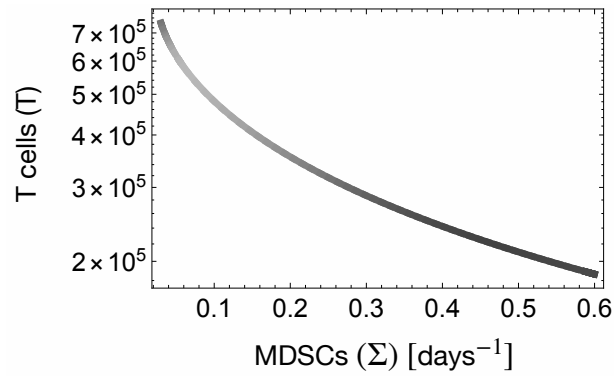

**Figure S1: T cells and MDSCs exhibit an inverse proportional behaviour.** Correlation between T cells and MDSC-mediated suppression is shown. The correlation was plotted using the analytical solutions of the T cell differential equation in steady state (Supplementary, Eq. S10) for increasing amounts of parameter  $\Sigma$ , representing the MDSCs.

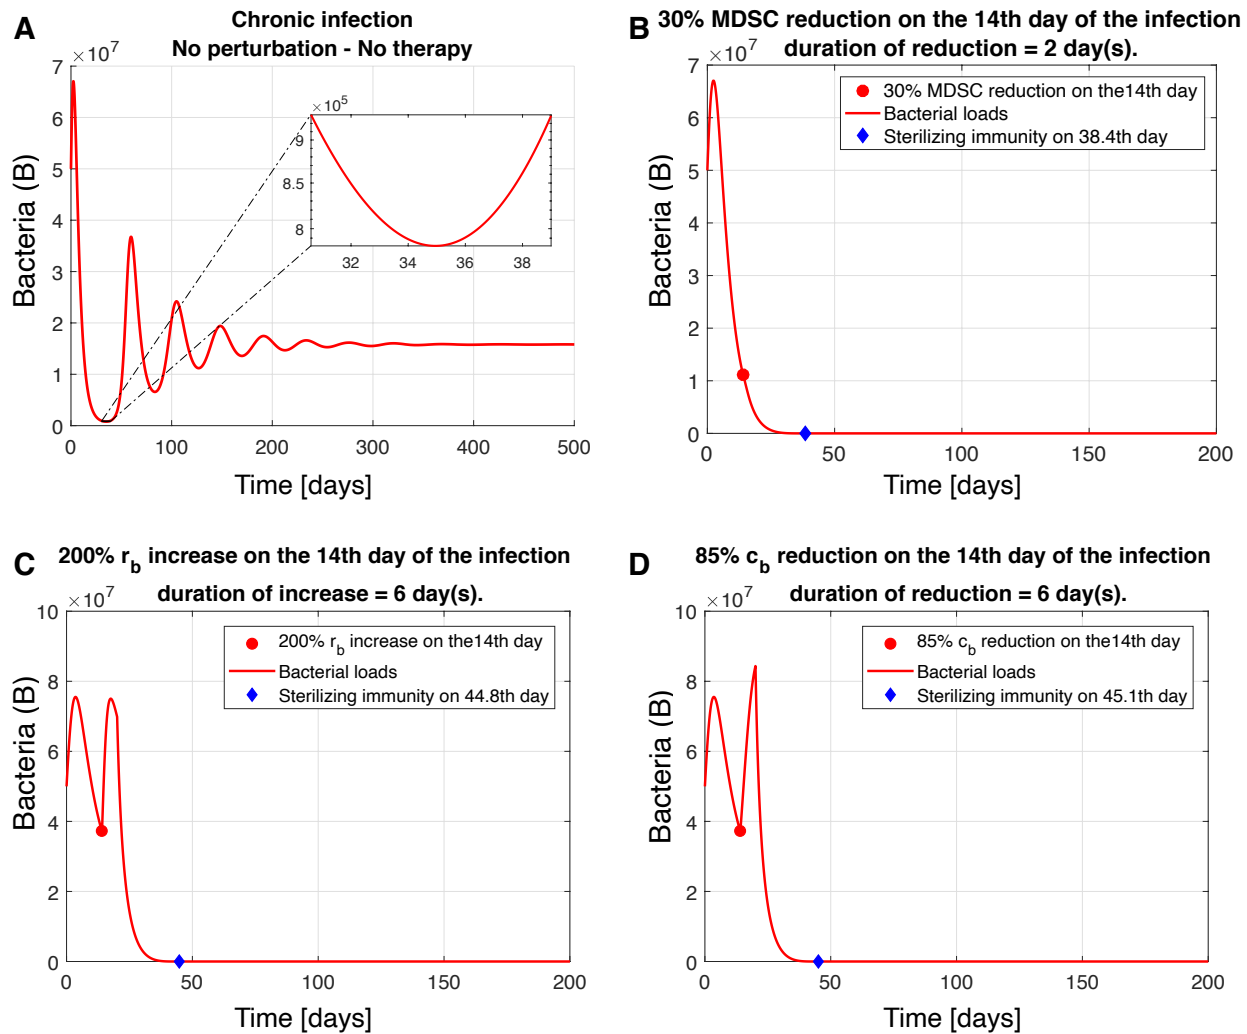

**Figure S2: Perturbation treatments *in silico* suggest eradication of the bacterium.** (A) Progression of *S. aureus* infection without perturbation treatment results in a stable state, clinically considered as chronic infection. The plotted bacterial dynamics in time is the numerical solution the ODE system (Eq. (1)). Chronic infection systems perturbed with treatments of either (B) diminished MDSC-mediated immunosuppression ( $\Sigma$ ) by 30%, (C) increased bacterial growth ( $r_b$ ) by 200%, or (D) decreased bacterial killing via T cells ( $c_b$ ) by 85%, render sterilizing immunity *in silico* (represented with  $\blacklozenge$ ). Treatments were applied on the 14th day post-infection (represented with  $\bullet$ ) by decreasing or increasing the fitted value of the parameter of interest (Table 1) for a perturbation window of 2 or 6 days.

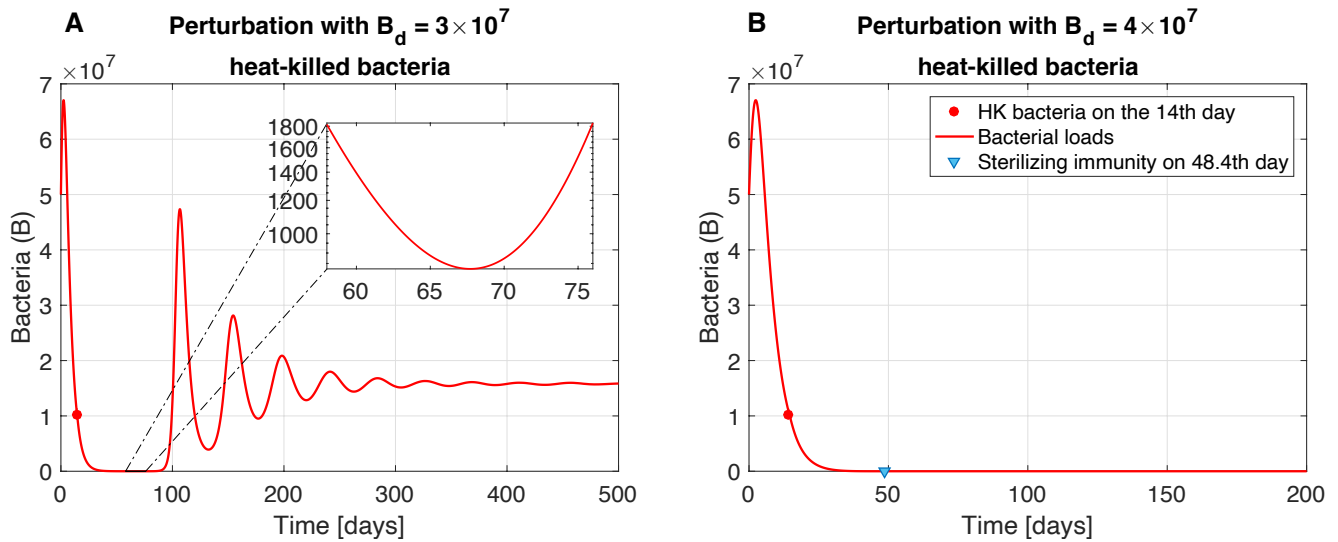

**Figure S3: Minimum heat-killed dose  $B_d$  required for sterilizing immunity.** (A) Sterilizing immunity is not rendered when perturbing on day 14th (represented with  $\bullet$ ) with dose of  $B_d = 3 \times 10^7$  heat-killed bacteria or less. However, (B) sterilizing immunity is attained by administering a heat-killed bacteria injection of minimum  $B_d = 4 \times 10^7$  cells. The treatments were administered *in silico* by adding the term  $k_b \cdot B_d$  in the T-cell ODE at time  $t =$  Perturbation day for a 12-hour perturbation window (Methods).

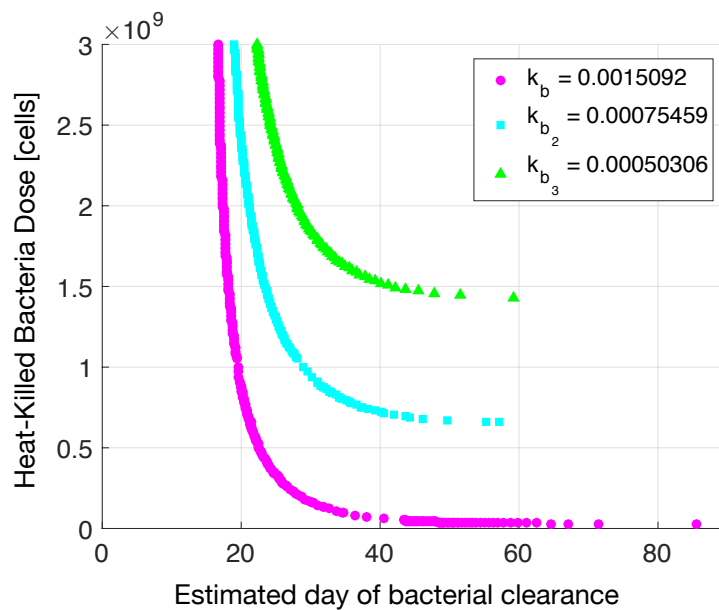

**Figure S4: Heat-killed bacteria dose versus time of clearance.** Stimulation of adaptive immune cells by heat-killed *S. aureus* cells happens with rate  $k_b$  as defined during the fitting process (Table 1). Non-antigen specific stimulation means that streptococcal heat-killed bacteria stimulate the immune system with a lower rate than staphylococcal HK cells, e.g.  $k_{b_2} = k_b/2$  or  $k_{b_3} = k_b/3$ . Simulation of treatment was done by adding the term  $k_b \cdot B_d$  in the T cell ODE for a perturbation window of half day (Methods), where  $k_b$  the immunostimulatory parameter and  $B_d$  different doses of HK cells. The estimated day of clearance was defined the first time point when bacterial numbers  $< 0.000001$ .

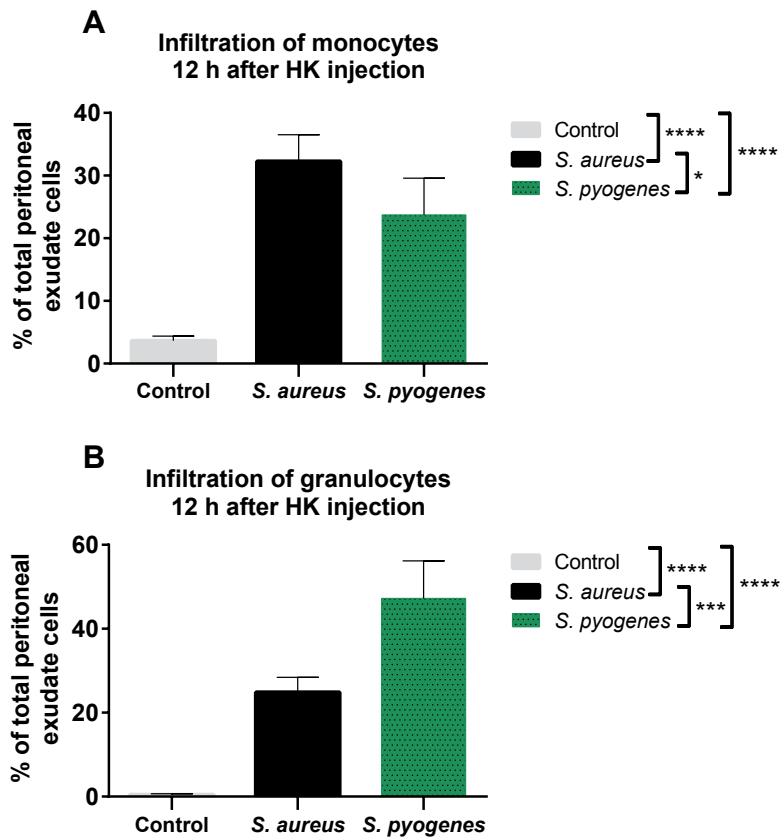

**Figure S5: Infiltration of monocytes and granulocytes after intraperitoneal injection with HK *S. aureus* cells or *S. pyogenes* cells.** Twelve hours after the administration of HK injection with *S. aureus* or *S. pyogenes* we collected peritoneal exudate cells (see Methods) and observed (A) massive infiltration of CD11b<sup>+</sup>Ly6C<sup>+</sup> monocytes and (B) of CD11b<sup>+</sup>Ly6G<sup>+</sup> granulocytes (neutrophils). All results were obtained from cohorts of five animals from two independent experiments.

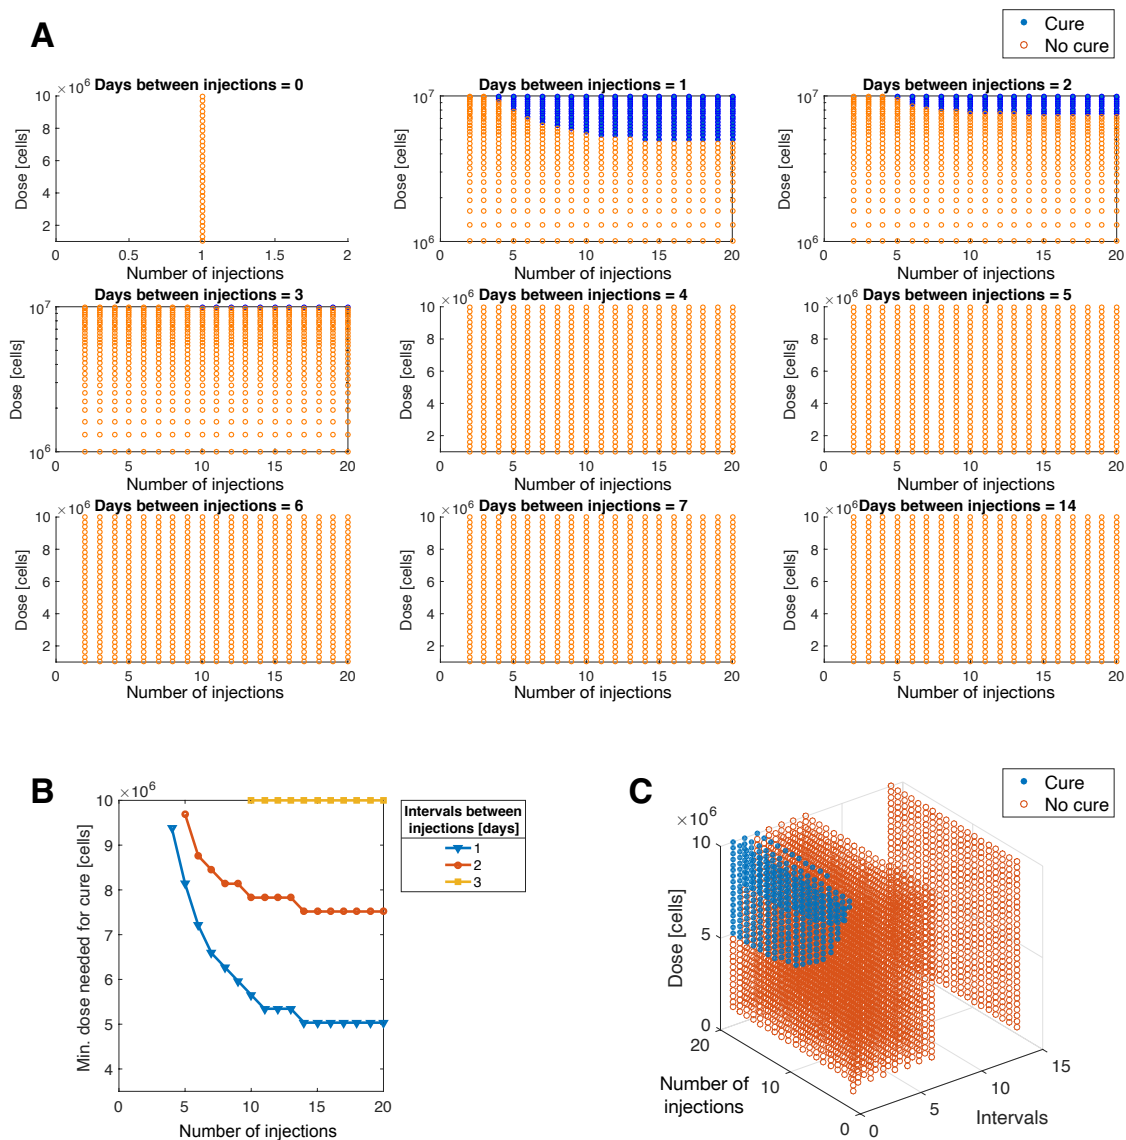

**Figure S6: Correlation between HK doses, number of HK injections and intervals between injections.** *In silico* predictions for cure plotted for HK doses ranging from  $10^6$  to  $10^7$ , number of injections between 1 to 20, and intervals between injections from 0 days to 7 days, or 2 weeks. For each injection day, the treatment was incorporated in the T cell ODE as  $k_b \cdot B_d$ , where  $k_b$  the parameter defined in Table 1 and  $B_d$  the administered dose (Methods). **(A)** Reduction of both the cure regime (blue) and possibility of cure with increasing intervals between HK injections. **(B)** Minimum HK dose needed for cure according to the number of HK injections and intervals between injections. For HK doses in the range  $[10^6, 10^7]$  cure can be achieved only if the injections have intervals of 1, 2 or 3 days. **(C)** Three dimensional plot shows the "Cure" and "No cure" regions and their interconnection between HK dose, HK injections and intervals between injections.

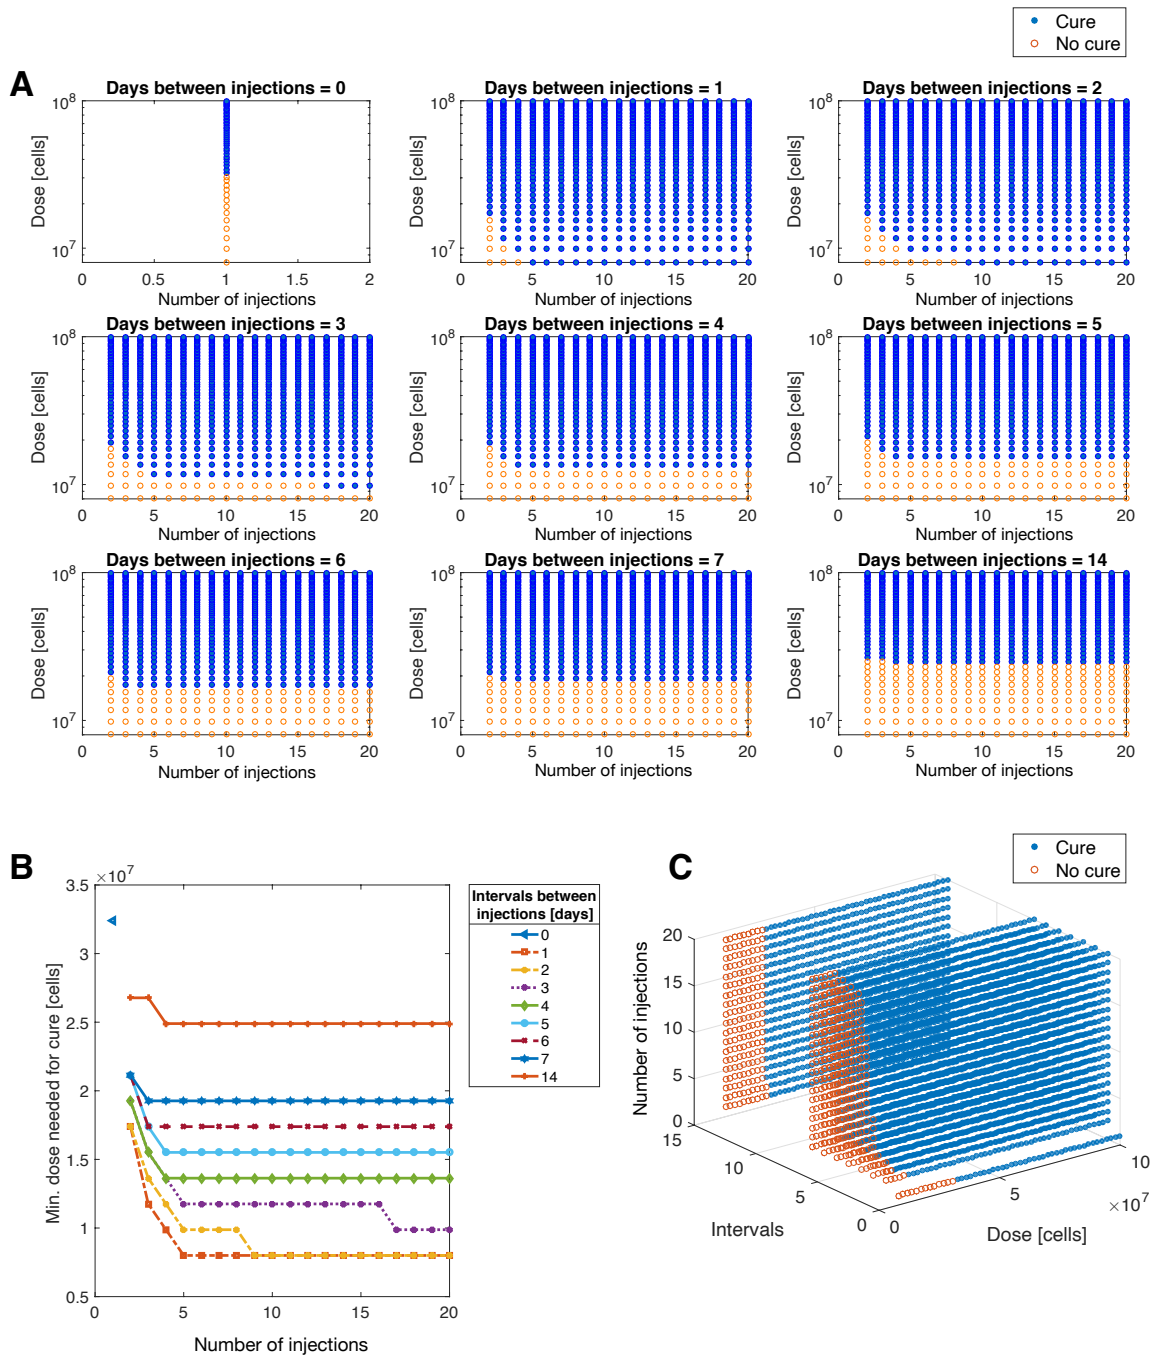

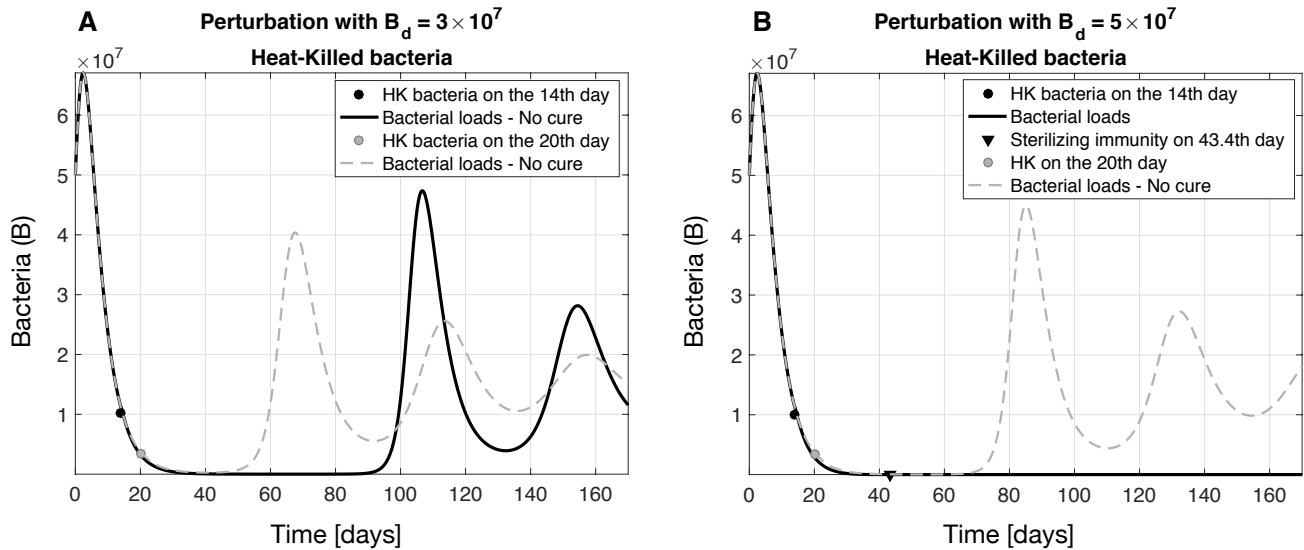

**Figure S8: The administration time of the HK injection is crucial for the outcome of the infection.** (A) Administration of HK injection with  $B_d = 3 \times 10^7$  cells is below the critical HK dose that is required for cure (estimated to be  $4 \times 10^7$  in Fig. S3). However, HK injection on the 14th day post-infection confers longer remission of infection than when administering the same HK dose on the 20th day post-infection. (B) Time of HK injection is decisive for the outcome of the infection. Administration of HK injection on the 14th day post-infection imparts sterilizing immunity, while administration of the HK injection on the 20th day post-infection does not affect the infection status. The HK treatment *in silico* was done by adding the term  $k_b \cdot B_d$  in the T-cell ODE at time  $t = 14$  or  $t = 20$  for a 12-hour perturbation window (see Methods).

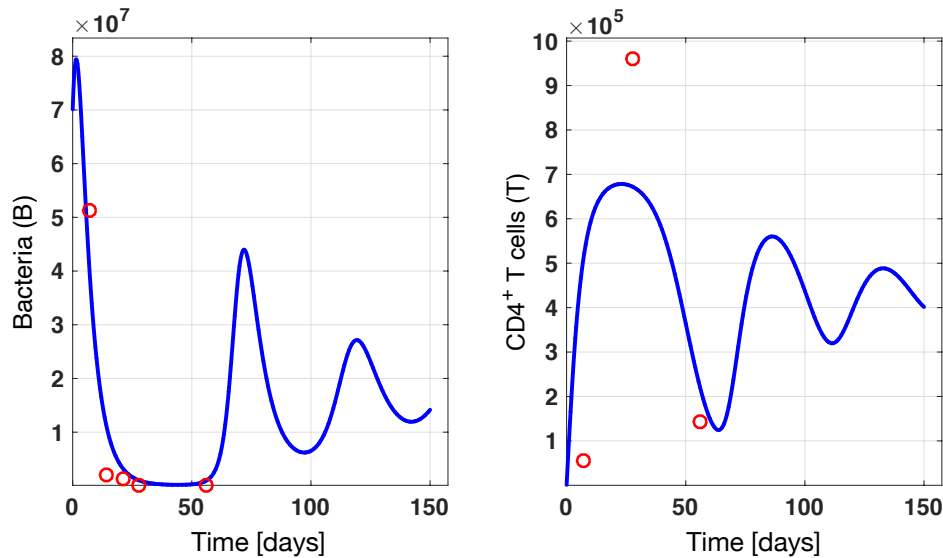

**Figure S9:** Plots for fitted model parameters  $r_t$ ,  $c_T$ ,  $k_b$ ,  $c_b$ , and  $\Sigma$  using a Markov Chain Monte Carlo version of Differential Evolution algorithm (Methods). Parameter values and confidence intervals are shown in Table 1.

542

## Scaling the model

With the following change of variables we non-dimensionalize the ODE model (2).

$$\begin{aligned} B &= \beta_0 \xi \\ T &= c_0 \psi \\ t &= t_0 \tau \end{aligned} \implies \frac{dB(t)}{dt} = \frac{\beta_0 d\xi}{t_0 d\tau} = r_b \beta_0 \xi - \frac{r_b}{\kappa} \beta_0^2 \xi^2 - c_b c_0 \psi \beta_0 \xi$$



$$\implies \frac{d\xi}{d\tau} = r_b t_0 \xi - \frac{r_b}{\kappa} t_0 \beta_0 \xi^2 - c_b t_0 c_0 \xi \psi \quad (\text{S1})$$

Let's say that the coefficients of  $\xi$ ,  $\xi^2$  and  $\xi \psi$  are equal 1. Then

$$t_0 = \frac{1}{r_b}, \quad \beta_0 = \kappa, \quad c_0 = \frac{r_b}{c_b}. \quad (\text{S2})$$

Therefore the new, non-dimensionalized equation for bacteria is

$$\frac{d\xi}{d\tau} = \xi - \xi^2 - \xi \psi \quad (\text{S3})$$

For the equation  $\dot{T}(t)$  we have the non-dimensionalized calculations:

$$\frac{dT(t)}{dt} = \frac{c_0 d\psi}{t_0 d\tau} = r_t c_0^2 \psi^2 + k_b \beta_0 \xi - c_T \beta_0 \xi c_0 \psi - \Sigma c_0 \psi \quad (\text{S4})$$

$$\implies \frac{d\psi}{d\tau} = r_t t_0 c_0 \psi^2 - \Sigma t_0 \psi - c_T \beta_0 t_0 \xi \psi + \frac{k_b \beta_0 t_0}{c_0} \xi \quad (\text{S5})$$

Substitution of the  $t_0$ ,  $\beta_0$  and  $c_0$  (found in Equation (S2)) gives the scaled equation for T:

$$\frac{d\psi}{d\tau} = \alpha \psi^2 + \beta \xi - \gamma \xi \psi - \delta \psi \quad (\text{S6})$$

where

$$\alpha = \frac{r_t}{c_b}, \quad \beta = \frac{\kappa k_b c_b}{r_b^2}, \quad \gamma = \frac{\kappa c_T}{r_b}, \quad \delta = \frac{\Sigma}{r_b}. \quad (\text{S7})$$

## Calculation of Equilibrium points

From equation (S3) we have:

$$\xi - \xi^2 - \xi \psi = 0 \implies \xi = 0, \quad \text{and} \quad \xi = 1 - \psi \quad (\text{S8})$$

• For  $\xi = 0$  in equation (S6) we have:

$$\frac{d\psi}{d\tau} = 0 \implies \alpha \psi^2 - \delta \psi = 0 \implies \psi_1 = 0, \quad \text{and} \quad \psi_2 = \frac{\delta}{\alpha} \quad (\text{S9})$$

• For  $\xi = 1 - \psi$  in equation (S6) in steady state we conclude that:

$$\psi_{3,4} = \frac{\beta + \gamma + \delta \pm \sqrt{[-(\beta + \gamma + \delta)]^2 - 4\beta(\alpha + \gamma)}}{2(\alpha + \gamma)} \quad (\text{S10})$$

Consequently the system has four equilibrium points in total:

- $(\xi_1, \psi_1) = (0, 0)$
- $(\xi_2, \psi_2) = (0, \frac{\delta}{\alpha})$
- $(\xi_{3,4}, \psi_{3,4}) = (1 - \psi_{3,4}, \psi_{3,4})$  where  $\psi_{3,4}$  is shown in equation (S10).

## 565 Existence of $\psi_{3,4}$

566 Equilibrium points  $\psi_{3,4}$  exist only when  $\Delta = (\beta + \gamma + \delta)^2 - 4\beta(\alpha + \gamma) \geq 0$ , i.e. only when  $\psi_{3,4}$  have no imaginary  
567 part.

$$\begin{aligned} \text{Equivalently } (\beta + \gamma + \delta)^2 - 4\beta(\alpha + \gamma) &\geq 0 \\ \beta^2 + \gamma^2 + \delta^2 + 2\beta\gamma + 2\beta\delta + 2\gamma\delta - 4\alpha\beta - 4\beta\gamma &\geq 0 \quad (\pm 4\beta\delta) \\ \beta^2 + \gamma^2 + \delta^2 - 2\beta\gamma - 2\beta\delta + 2\gamma\delta - 4\beta(\alpha - \delta) &\geq 0 \end{aligned}$$

$$(-\beta + \gamma + \delta)^2 - 4\beta(\alpha - \delta) \geq 0 \quad (\text{S11})$$

570 According to the sign of the term  $(\alpha - \delta)$  in condition (S11), we investigate when the equilibrium points  
571  $\psi_{3,4}$  exist.

572 • If  $\alpha - \delta \leq 0 \implies \delta \geq \alpha$  then the equilibria  $\psi_{3,4}$  exist.

573 • If  $0 < \delta < \alpha$  then we reformulate  $\Delta$  as follows:

$$\Delta = (-\beta + \gamma + \delta - 2\sqrt{\beta}\sqrt{\alpha - \delta}) \cdot (-\beta + \gamma + \delta + 2\sqrt{\beta}\sqrt{\alpha - \delta}) \quad (\text{S12})$$

a) If  $-\beta + \gamma + \delta \geq 0$  then for existence of  $\psi_{3,4}$  we require  $-\beta + \gamma + \delta - 2\sqrt{\beta}\sqrt{\alpha - \delta} \geq 0$ . Then:

$$\begin{aligned} -\beta + \gamma + \delta - 2\sqrt{\beta}\sqrt{\alpha - \delta} \geq 0 &\implies \beta - (\gamma + \delta) + 2\sqrt{\beta}\sqrt{\alpha - \delta} \leq 0 \\ \sqrt{\beta}^2 + 2\sqrt{\beta}\sqrt{\alpha - \delta} - (\gamma + \delta) \leq 0 &\implies \sqrt{\beta} \leq \frac{-2\sqrt{\alpha - \delta} \pm \sqrt{4(\alpha - \delta) - 4[-(\gamma + \delta)]}}{2} \end{aligned}$$

$$\sqrt{\beta} \leq -\sqrt{\alpha - \delta} + \sqrt{\alpha + \gamma} \quad (\text{S13})$$

576 **Note:** The solution  $\sqrt{\beta} \leq -\sqrt{\alpha - \delta} - \sqrt{\alpha + \gamma}$  is exempt because by definition  $\sqrt{\beta} \geq 0$ .

b) If  $-\beta + \gamma + \delta \leq 0$  then for existence of  $\psi_{3,4}$  we require  $-\beta + \gamma + \delta + 2\sqrt{\beta}\sqrt{\alpha - \delta} \leq 0$ . Then:

$$\begin{aligned} -\beta + \gamma + \delta + 2\sqrt{\beta}\sqrt{\alpha - \delta} \leq 0 &\implies \beta - (\gamma + \delta) - 2\sqrt{\beta}\sqrt{\alpha - \delta} \geq 0 \\ \sqrt{\beta}^2 - 2\sqrt{\beta}\sqrt{\alpha - \delta} - (\gamma + \delta) \geq 0 &\implies \sqrt{\beta} \geq \frac{2\sqrt{\alpha - \delta} \pm \sqrt{4(\alpha - \delta) - 4[-(\gamma + \delta)]}}{2} \end{aligned}$$

$$\sqrt{\beta} \geq \sqrt{\alpha - \delta} + \sqrt{\alpha + \gamma} \quad (\text{S14})$$

579 **Note:** The solution  $\sqrt{\beta} \geq \sqrt{\alpha - \delta} - \sqrt{\alpha + \gamma}$  is trivially exempt.

580 In summary, equilibrium points  $\psi_{3,4}$  exist for the range of  $\delta$  and  $\sqrt{k_b}$  shown in Fig. S10.

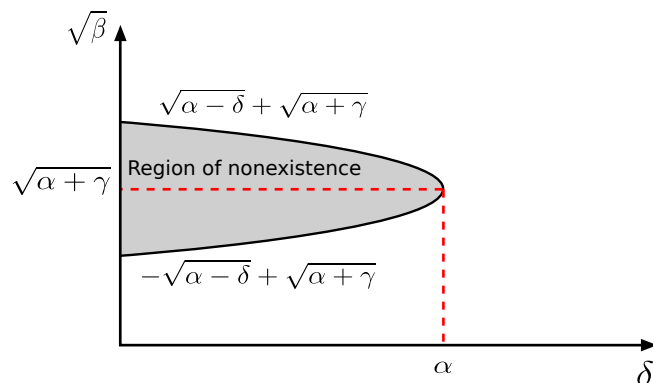

**Figure S10:** Existence of equilibrium points  $\psi_{3,4}$ .

## 581 Local stability analysis of equilibrium points

$$\text{Jacobian Matrix } J = \begin{bmatrix} \frac{\partial \dot{\xi}}{\partial \xi} & \frac{\partial \dot{\xi}}{\partial \psi} \\ \frac{\partial \dot{\psi}}{\partial \xi} & \frac{\partial \dot{\psi}}{\partial \psi} \end{bmatrix} = \begin{bmatrix} 1 - 2\xi - \psi & -\xi \\ \beta - \gamma\psi & 2\alpha\psi - \gamma\xi - \delta \end{bmatrix} \quad (\text{S15})$$

Evaluation of Jacobian matrix in the trivial equilibrium point  $(\xi_1, \psi_1)$ :

$$J(0,0) = \begin{bmatrix} 1 & 0 \\ \beta & -\delta \end{bmatrix} \implies |J(0,0)| = -\delta < 0 \quad (\text{S16})$$

Since the determinant of the Jacobian matrix in equation (S16) is negative (i.e.  $\det = -\delta < 0$ ), it means that the eigenvalues are of a different sign, and hence the trivial equilibrium point is unstable (i.e. saddle point, which is always unstable).

For the equilibrium point  $(\xi_2, \psi_2) = (0, \frac{\delta}{\alpha})$  we have:

$$J(\xi_2, \psi_2) = \begin{bmatrix} 1 - \frac{\delta}{\alpha} & 0 \\ \beta - \gamma\frac{\delta}{\alpha} & 2\alpha\frac{\delta}{\alpha} - \delta \end{bmatrix} = \begin{bmatrix} 1 - \frac{\delta}{\alpha} & 0 \\ \beta - \frac{\gamma\delta}{\alpha} & \delta \end{bmatrix} \implies |J| = \delta \cdot \left(1 - \frac{\delta}{\alpha}\right) \text{ for the equilibrium point } (\xi_2, \psi_2) \quad (\text{S17})$$

582

583

584 The sign of the determinant depends on the term  $\left(1 - \frac{\delta}{\alpha}\right)$ . When  $\delta > \alpha$ , the equilibrium point is saddle.

585 This becomes unstable when  $\delta < \alpha$ . Next, we evaluate the Jacobian matrix in the equilibrium points  $(\xi_{3,4}, \psi_{3,4})$ ,  
586 by using  $\xi = 1 - \psi \geq 0$ ,

$$|J(1 - \psi, \psi)| = \begin{vmatrix} -1 + \psi & -1 + \psi \\ \beta - \gamma\psi & (2\alpha + \gamma)\psi - (\gamma + \delta) \end{vmatrix} = -(-1 + \psi)(\beta + \delta + \gamma - 2(\alpha + \gamma)\psi) \quad (\text{S18})$$

$$= -(1 - \psi)(2(\alpha + \gamma)\psi - (\beta + \delta + \gamma)). \quad (\text{S19})$$

We obtain the trace of the Jacobian matrix to determine the type of stability of equilibrium points  $(\xi_{3,4}, \psi_{3,4})$ ,

$$\text{tr}(J) = -1 - \delta + \gamma(-1 + \psi) + \psi + 2\alpha\psi = (1 + 2\alpha + \gamma)\psi - (1 + \gamma + \delta) \quad (\text{S20})$$

587 We first need to find some critical values for  $\psi$ :

588 • If  $|J(1 - \psi, \psi)| = 0$ , then

$$\psi_1^* = \frac{\beta + \gamma + \delta}{2(\alpha + \gamma)} \quad (\text{S21})$$

590 We know that the term  $(1 - \psi)$  equals  $\xi$ , which represents the bacteria, and hence  $\xi = 1 - \psi \geq 0$ .

591 • If  $\text{tr}(J) = 0$ , then

$$\psi_2^* = \frac{1 + \gamma + \delta}{1 + 2\alpha + \gamma} \quad (\text{S22})$$

593

594 From the critical points found in equations (S21) and (S22), the stability of the equilibrium points  $(\xi_{3,4}, \psi_{3,4}) =$   
595  $(1 - \psi_{3,4}, \psi_{3,4})$  can be classified as follows:

- 596 • **Stable node or spiral (Represents the chronic phase):**

$$597 \quad \begin{array}{l} |J| \geq 0 \\ \text{tr}(J) \leq 0 \end{array} \implies \begin{array}{l} \psi_1^* \leq \frac{\beta + \gamma + \delta}{2(\alpha + \gamma)} \\ \psi_2^* \leq \frac{1 + \gamma + \delta}{1 + 2\alpha + \gamma} \end{array} \implies \psi^* \leq \min\{\psi_1^*, \psi_2^*\} \quad (\text{S23})$$

- 598 • **Saddle equilibrium point:**

$$599 \quad |J| < 0 \implies \psi_1^* > \frac{\beta + \gamma + \delta}{2(\alpha + \gamma)} \implies \psi^* > \frac{\beta + \gamma + \delta}{2(\alpha + \gamma)} \quad (\text{S24})$$

- 600 • **Unstable node or spiral:**

$$601 \quad \begin{array}{l} |J| \geq 0 \\ \text{tr}(J) \geq 0 \end{array} \implies \begin{array}{l} \psi_1^* \leq \frac{\beta + \gamma + \delta}{2(\alpha + \gamma)} \\ \psi_2^* \geq \frac{1 + \gamma + \delta}{1 + 2\alpha + \gamma} \end{array} \implies \begin{array}{l} \psi^* \leq \psi_1^* \\ \psi^* \geq \psi_2^* \end{array} \implies \frac{\beta + \gamma + \delta}{2(\alpha + \gamma)} \geq \psi^* \geq \frac{1 + \gamma + \delta}{1 + 2\alpha + \gamma} \quad (\text{S25})$$

602 However, since from fitting results (Table 1)  $c_T \simeq 0$ , we conclude that

$$603 \quad \psi_1^* \simeq \frac{\beta + \delta}{2\alpha} \quad \text{and} \quad \psi_2^* \simeq \frac{1 + \delta}{1 + 2\alpha}. \quad (\text{S26})$$

Assuming  $\Sigma^* = \frac{r_t r_b}{c_b}$  and substituting  $\alpha$ ,  $\beta$ , and  $\delta$  from equations (S7),

$$\psi_2^* = \frac{1 + \frac{\Sigma}{r_b}}{1 + \frac{2r_t}{c_b}} = \frac{r_b + \Sigma}{r_b + 2\Sigma^*}.$$

604 Since  $\xi$  and  $\psi$  are normalized,  $\xi, \psi \geq 0$  and therefore  $0 \leq \psi_1^*, \psi_2^* \leq 1$ . Hence  $\psi_2^* \leq 1$  resulting in

$$605 \quad \Sigma \leq 2\Sigma^* \quad (\text{S27})$$

Now

$$\psi_1^* = \frac{\frac{\kappa k_b c_b}{r_b^2} + \frac{\Sigma}{r_b}}{2 \frac{r_t}{c_b}} = \frac{1}{2\Sigma^*} \left( \frac{\kappa k_b r_t}{\Sigma^*} + \Sigma \right)$$

From equation (S27)

$$\psi_1^* \leq \frac{1}{2\Sigma^*} \left( \frac{\kappa k_b r_t}{\Sigma^*} + 2\Sigma^* \right) = 1 + \frac{\kappa k_b r_t}{2(\Sigma^*)^2} > 1$$

606 As a consequence,  $\psi_1^*$  is rejected and the stability analysis for the equilibrium points  $(\xi_{3,4}, \psi_{3,4}) = (1 - \psi_{3,4}, \psi_{3,4})$   
607 can be updated as follows:

- 608 • **Stable node or spiral (Represents the chronic phase):**

$$609 \quad \psi^* \leq \psi_2^* \implies \psi^* \leq \frac{1 + \gamma + \delta}{1 + 2\alpha + \gamma} \quad (\text{S28})$$

- 610 • **Unstable node or spiral:**

$$611 \quad \psi^* \geq \psi_2^* \implies \psi^* \geq \frac{1 + \gamma + \delta}{1 + 2\alpha + \gamma} \quad (\text{S29})$$

612  
613
